# Supplementary material for: A cytosine base editor toolkit with varying activity windows and target scopes for versatile gene manipulation in plants
Source: PubMed Central journal article supplement — Nucleic Acids Res. 2022 Mar 14;50(6):3565–80. doi: 10.1093/nar/gkac166 (PMC8989527; doi:10.1093/nar/gkac166), 2022-03-14
Supplement: gkac166_supplemental_file.pdf [file gkac166_supplemental_file.pdf]

## **Supplementary Data**

### **A cytosine base editor toolkit with varying activity windows and target scopes for versatile gene manipulation in plants**

Xiangyu Xiong<sup>1,2</sup>, Zhenxiang Li<sup>1,2,\*</sup>, Jieping Liang<sup>1</sup>, Kehui Liu<sup>1</sup>, Chenlong Li<sup>1</sup> & Jian-Feng Li<sup>1,\*</sup>

<sup>1</sup>MOE Key Laboratory of Gene Function and Regulation, State Key Laboratory of Biocontrol, Guangdong Provincial Key Laboratory of Plant Resources, School of Life Sciences, Sun Yat-sen University, Guangzhou 510275, China

<sup>2</sup>These authors contributed equally to this work.

\*Correspondence should be addressed to Z.L. (lizhenx5@mail2.sysu.edu.cn) or J.-F.L (lijfeng3@mail.sysu.edu.cn)

## Table of contents

| Supplementary Item                                                                                                                                                                 | Page  |
|------------------------------------------------------------------------------------------------------------------------------------------------------------------------------------|-------|
| <b>Supplementary Figure S1.</b> Protein sequence alignment of wild-type hAID, hAID*Δ, and AID10                                                                                    | 4     |
| <b>Supplementary Figure S2.</b> <i>XhoI</i> -resistant mutant alleles of the <i>OsERI-T1</i> locus generated by APOBEC1-nCas9-UGI, AID10-nCas9-UGI, or AID10-nCas9 in protoplasts  | 5     |
| <b>Supplementary Figure S3.</b> Mutant allele compositions of three target sites edited by APOBEC1-nCas9-UGI, AID10-nCas9-UGI, or AID10-nCas9 in protoplasts                       | 6     |
| <b>Supplementary Figure S4.</b> Base editing at two genomic loci by APOBEC1-nCas9-UGI or AID10-nCas9-UGI in transgenic rice plants                                                 | 7     |
| <b>Supplementary Figure S5.</b> Disruption of the intron splice site in <i>OsLAZY1</i> by AID10-nCas9-UGI produces gene knockout phenotype in transgenic rice plants               | 8     |
| <b>Supplementary Figure S6.</b> Base editing at the <i>AtCER10</i> locus by APOBEC1-nCas9-UGI or AID10-nCas9-UGI in transgenic <i>Arabidopsis</i> plants                           | 9     |
| <b>Supplementary Figure S7.</b> Disruption of the intron splice site in <i>AtCER10</i> by AID10-nCas9-UGI produces gene knockout phenotype in transgenic <i>Arabidopsis</i> plants | 10    |
| <b>Supplementary Figure S8.</b> Base editing at three genomic loci by AID10-nSpCas9-UGI or AID10-nSaCas9-UGI in transgenic <i>Arabidopsis</i> plants                               | 11    |
| <b>Supplementary Figure S9.</b> Amplicon deep sequencing reveals no guide-dependent off-target editing by AID10-nSpCas9-NG-UGI and AID10-nSaCas9-KKH-UGI in protoplasts            | 12    |
| <b>Supplementary Figure S10.</b> Base editing at the <i>OsSLR1</i> locus by AID10-nCas9-AID10-UGI in transgenic rice plants                                                        | 13    |
| <b>Supplementary Figure S11.</b> Base editing at the <i>OsCKX2</i> locus by ABE7.10-nCas9-AID10 in transgenic rice plants                                                          | 14    |
| <b>Supplementary Figure S12.</b> Simultaneous editing of cytosines and adenines at the same target sequence by AID10- and Tada7.10-based dual base editors                         | 15    |
| <b>Supplementary Figure S13.</b> Luciferase reporter assay reflects inhibitory effects of different <i>AtBAK1</i> uORF mutations on the primary ORF                                | 16    |
| <b>Supplementary Figure S14.</b> AID10 cytosine deaminase shows no sequence context bias in plant cells                                                                            | 17    |
| <b>Supplementary Table S1.</b> Summary of editing targets in this study                                                                                                            | 18-19 |
| <b>Supplementary Table S2.</b> Primers used for amplification of target sites in this study                                                                                        | 20-23 |

|                                                                                                                        |       |
|------------------------------------------------------------------------------------------------------------------------|-------|
| <b>Supplementary Table S3.</b> Primers used for qPCR analysis in this study                                            | 24    |
| <b>Supplementary Table S4.</b> Summary of base editing outcomes in transgenic <i>Arabidopsis</i> T1 and rice T0 plants | 25-26 |
| <b>Supplementary Table S5.</b> Summary of base editors developed in this study                                         | 27    |
| <b>Supplementary Sequence.</b> Amino acid sequences of base editors tested in this study                               | 28-45 |

|        |     |                                                                |                                                                   |          |    |
|--------|-----|----------------------------------------------------------------|-------------------------------------------------------------------|----------|----|
| hAID   | 1   | MDSL                                                           | LLMNRRKFLYQFKNVRWAKGRRETYLCYVVKRRDSATSFS                          | SLDFGYLR | 50 |
| hAID*Δ | 1   | MDSL                                                           | LLMNRR <b>E</b> FLYQFKNVRWAKGRRETYLCYVVKRRDSATSFS                 | SLDFGYLR | 50 |
| AID10  | 1   | MDSL                                                           | LLMNRR <b>E</b> FLYQFKNVRWAKGRRETYLCYVV <b>ERRD</b> CATSFS        | SLDFGYLR | 50 |
|        |     |                                                                |                                                                   |          |    |
| hAID   | 51  | NKNG                                                           | CHVELLFLRYISDWDLDPGRCYRVTWFTSWSPCYDCARHVADFLRG                    | 100      |    |
| hAID*Δ | 51  | NKNG                                                           | CHVELLFLRYISDWDLDPGRCYRVTWF <b>I</b> SWSPCYDCARHVADFLRG           | 100      |    |
| AID10  | 51  | NKNG                                                           | CHVELLFLRYISDWDLDPGRCYRVTWF <b>I</b> SWSPCYDCARHVADFLRG           | 100      |    |
|        |     |                                                                |                                                                   |          |    |
| hAID   | 101 | NP                                                             | NLSLRIFTARLYFCEDRKAEPGLRRLHRAGVQIAIMTFKDYFYCWNT                   | 150      |    |
| hAID*Δ | 101 | NP                                                             | NLSLRIFTARLYFCEDRKAEPGLRRLHRAGVQIAIMTFKDYFYCWNT                   | 150      |    |
| AID10  | 101 | NP                                                             | NLSLRIF <b>A</b> ARLYFCEDRKAEPGLRRL <b>R</b> RAGVQIAIMTFKDYFYCWNT | 150      |    |
|        |     |                                                                |                                                                   |          |    |
| hAID   | 151 | FV                                                             | ENHERTFKAWEGLHENSVRLSRQLRRILLPLYEVDDLRFRTLGL                      | 198      |    |
| hAID*Δ | 151 | FV                                                             | ENH <b>G</b> RTFKAWEGLHENSVRLSRQLRRILLPLYEVDDLRFRT---             | 195      |    |
| AID10  | 151 | F <b>A</b> ENH <b>G</b> RTFKAWEGLHENSVRLS <b>G</b> QLRRIL----- |                                                                   | 180      |    |

**Supplementary Figure S1. Protein sequence alignment of wild-type hAID, hAID\*Δ, and AID10.**

Amino acid mutations are shadowed in yellow and truncations are indicated by dash lines.

| <i>OsER1-T1</i>   |                                                                      |              |
|-------------------|----------------------------------------------------------------------|--------------|
| WT                | 5' -- <u>AGAACTCGAGTCGCAAGTCG</u> <b>AGG</b> --3'                    | Clone number |
| APOBEC1-nCas9-UGI | 5' --AGAA <b>TT</b> TGAGTCGCAAGTCG <b>AGG</b> --3'                   | 6/9          |
|                   | 5' --AGAA <b>T</b> TGAGTCGCAAGTCG <b>AGG</b> --3'                    | 2/9          |
|                   | 5' --AGAA <b>CT</b> TGAG <b>T</b> TGCAAGTCG <b>AGG</b> --3'          | 1/9          |
| AID10-nCas9-UGI   | 5' --AGAA <b>T</b> TCGAGTCGCAAGTCG <b>AGG</b> --3'                   | 9/14         |
|                   | 5' --AGAA <b>TT</b> TGAGTCGCAAGTCG <b>AGG</b> --3'                   | 3/14         |
|                   | 5' --AGAA <b>TT</b> TGAG <b>T</b> TGCAAGTCG <b>AGG</b> --3'          | 1/14         |
|                   | 5' --AGAA <b>CT</b> TGAGTC <b>G</b> T <b>A</b> AGTCG <b>AGG</b> --3' | 1/14         |
| AID10-nCas9       | 5' --AGAA <b>T</b> TCGAGTCGCAAGTCG <b>AGG</b> --3'                   | 9/12         |
|                   | 5' --AGAA <b>TT</b> TGAGTCGCAAGTCG <b>AGG</b> --3'                   | 2/12         |
|                   | 5' --AGAA <b>G</b> TCGAGTCGCAAGTCG <b>AGG</b> --3'                   | 1/12         |

**Supplementary Figure S2. *Xho*I-resistant mutant alleles of the *OsER1-T1* locus generated by APOBEC1-nCas9-UGI, AID10-nCas9-UGI, or AID10-nCas9 in protoplasts.**

*Xho*I-resistant amplicons of the *OsER1-T1* locus induced by APOBEC1-nCas9-UGI, AID10-nCas9-UGI, or AID10-nCas9, were cloned and randomly selected for Sanger sequencing. The abundances of individual mutant alleles are indicated by the corresponding clone numbers divided by the total sequenced clone numbers. The target sequence and the PAM are underlined and in bold, respectively. The *Xho*I restriction site is marked in green and the C-to-T substitutions in mutant alleles are highlighted in red.

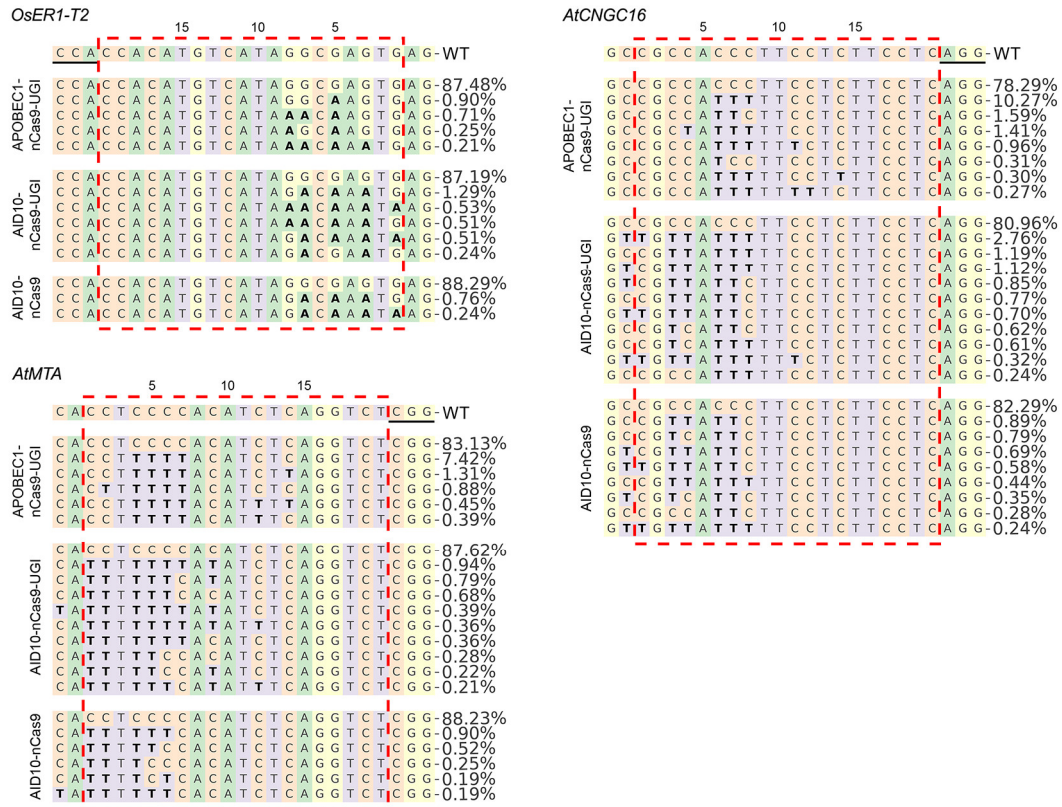

**Supplementary Figure S3. Mutant allele compositions of three target sites edited by APOBEC1-nCas9-UGI, AID10-nCas9-UGI, or AID10-nCas9 in protoplasts.**

C-to-T (or G-to-A) conversions are highlighted in bold and the frequencies of individual alleles are shown on the right. Dashed-line box marks the target sequence and the PAM is underlined. The numbers on the top indicate the protospacer positions. Data are collected from one biological replicate in Figure 1C.

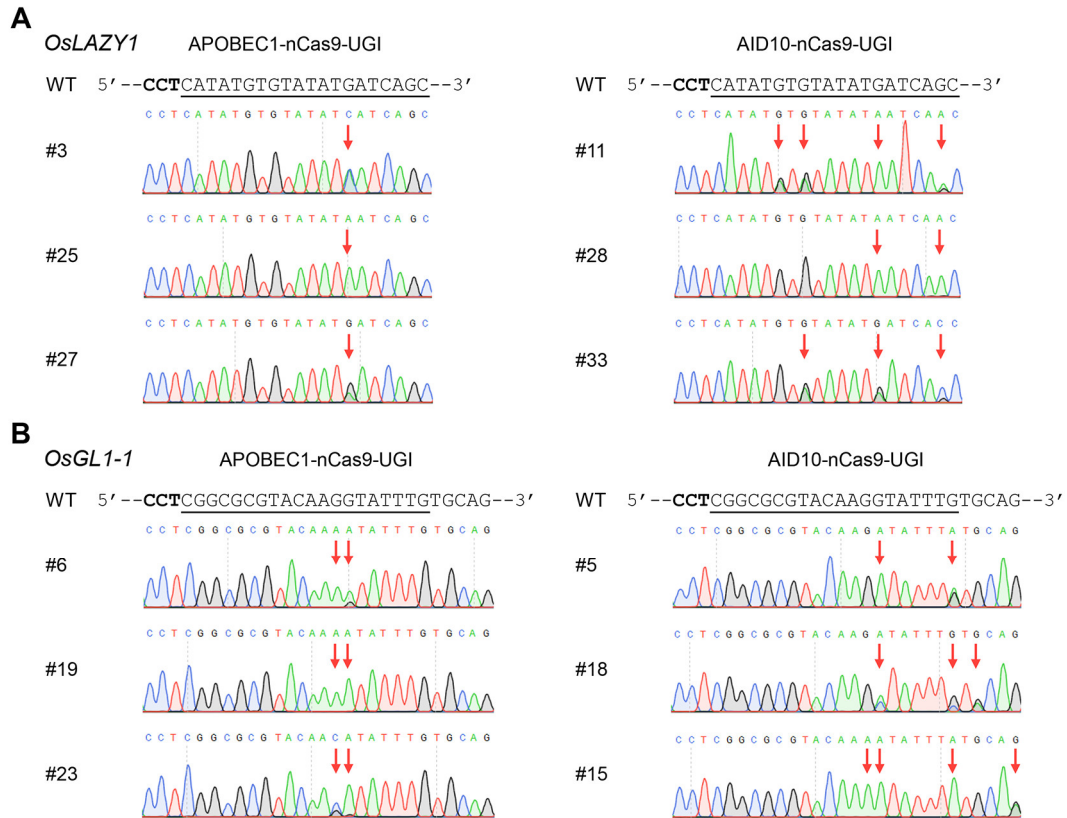

**Supplementary Figure S4. Base editing at two genomic loci by APOBEC1-nCas9-UGI or AID10-nCas9-UGI in transgenic rice plants.**

Sanger sequencing chromatograms evidence cytosine editing at the *OsLAZY1* (**A**) or *OsGL1-1* (**B**) locus by APOBEC1-nCas9-UGI (left) or AID10-nCas9-UGI (right) in transgenic T0 rice lines. Reverse complements of the target sequences and PAMs are underlined and in bold, respectively. Red arrows mark base substitutions.

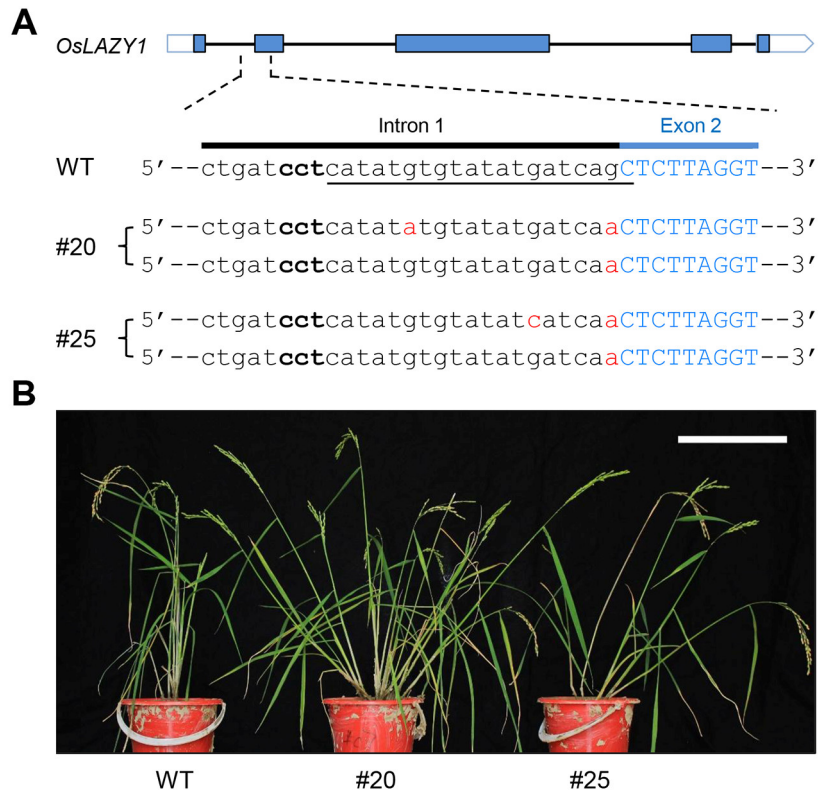

**Supplementary Figure S5. Disruption of the intron splice site in *OsLAZY1* by AID10-nCas9-UGI produces gene knockout phenotype in transgenic rice plants.**

(A) Two rice *lazy1* mutant alleles (lines #20 and #25) generated by AID10-nCas9-UGI. Sequences of the intron 1 and exon 2 are shown as black lowercase and blue uppercase letters, respectively. Reverse complements of the target sequence and PAM are underlined and in bold, respectively. Base conversions are highlighted in red. (B) Disruption of the intron splice site in *OsLAZY1* leads to increased tiller angle, resembling the reported rice *lazy1* null plants. Two-month-old plants are shown. Scale bar = 20 cm.



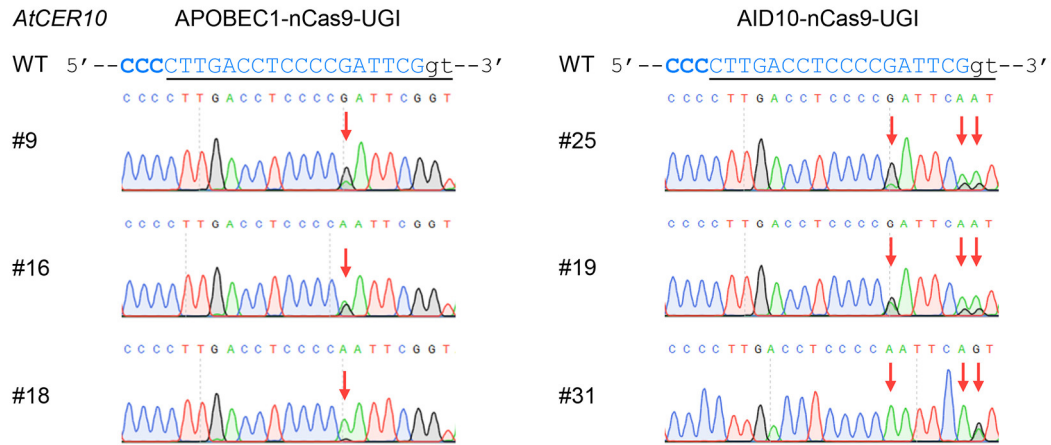

**Supplementary Figure S6. Base editing at the *AtCER10* locus by APOBEC1-nCas9-UGI or AID10-nCas9-UGI in transgenic *Arabidopsis* plants.**

Sanger sequencing chromatograms evidence cytosine editing at the *AtCER10* locus by APOBEC1-nCas9-UGI (left) or AID10-nCas9-UGI (right) in multiple transgenic T1 *Arabidopsis* lines. The expression of base editors was driven by the *ZmUbi* promoter. Reverse complements of the target sequence and PAM are underlined and in bold, respectively. Intronic and exonic sequences are shown as black lowercase and blue uppercase letters, respectively. Red arrows mark base substitutions.

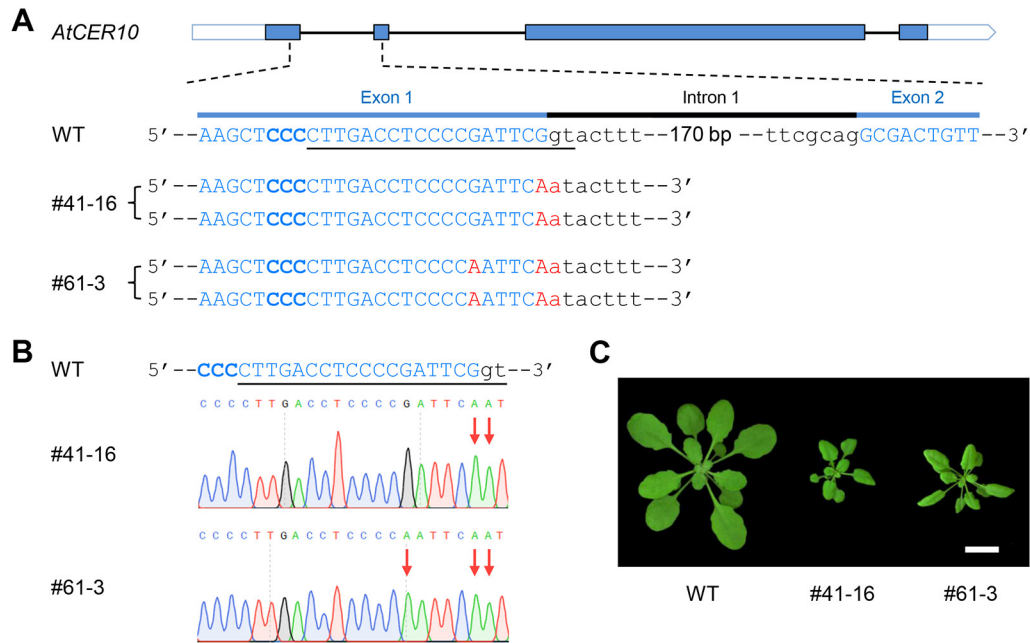

**Supplementary Figure S7. Disruption of the intron splice site in *AtCER10* by AID10-nCas9-UGI produces gene knockout phenotype in transgenic *Arabidopsis* plants.**

(A) Two T2 homozygous mutant alleles (lines #41-16 and #61-3) generated by AID10-nCas9-UGI. The expression of the base editor was driven by the egg cell-specific *EC1.2en-EC1.1p* promoter. Sequences of the intron 1 and neighboring exons are shown as lowercase and uppercase letters, respectively. Reverse complements of the target sequence and PAM are underlined and in bold, respectively. Base conversions are highlighted in red. (B) Sanger sequencing chromatograms show base substitutions (marked by red arrows) at the *AtCER10* target site in the two T2 mutant lines. (C) Disruption of the intron splice site in *AtCER10* leads to dwarfism, resembling the reported *Arabidopsis cer10* null plants. Four-week-old plants are shown. Scale bar = 1 cm.

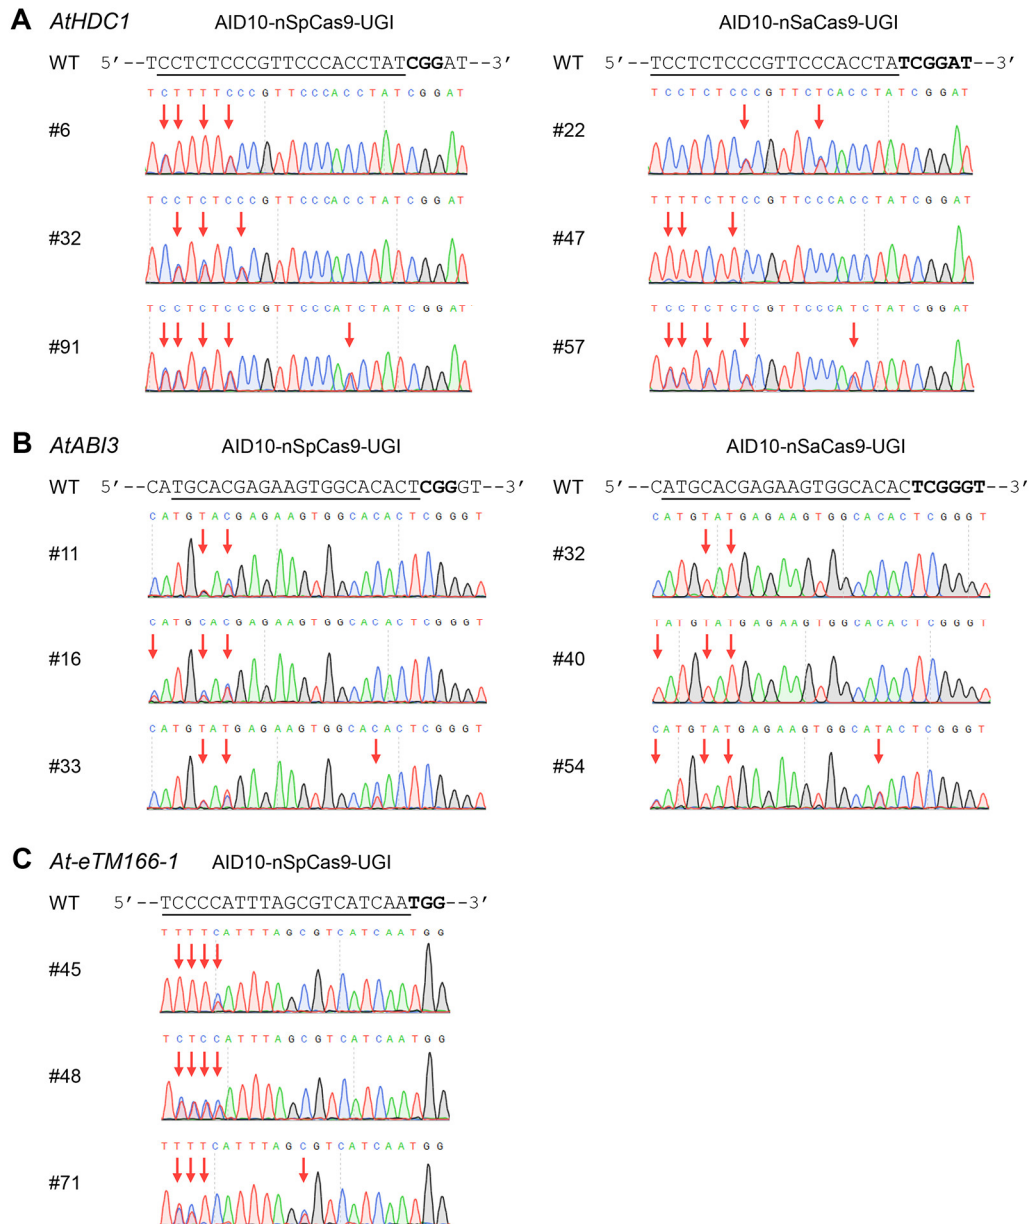

**Supplementary Figure S8. Base editing at three genomic loci by AID10-nSpCas9-UGI or AID10-nSaCas9-UGI in transgenic *Arabidopsis* plants.**

Sanger sequencing chromatograms for the *AtHDC1* (A), *AtABI3* (B) or *At-eTM166-1* (C) locus in representative transgenic T1 lines edited by AID10-nSpCas9-UGI (left) or AID10-nSaCas9-UGI (right). In (C), AID10-nSaCas9-UGI (not shown) failed to induce any detectable base change at the *At-eTM166-1* locus. The expression of base editors was driven by the egg cell-specific *EC1.2en-EC1.1p* promoter. The target sequences are underlined and the PAMs are in bold. Red arrows mark base substitutions.

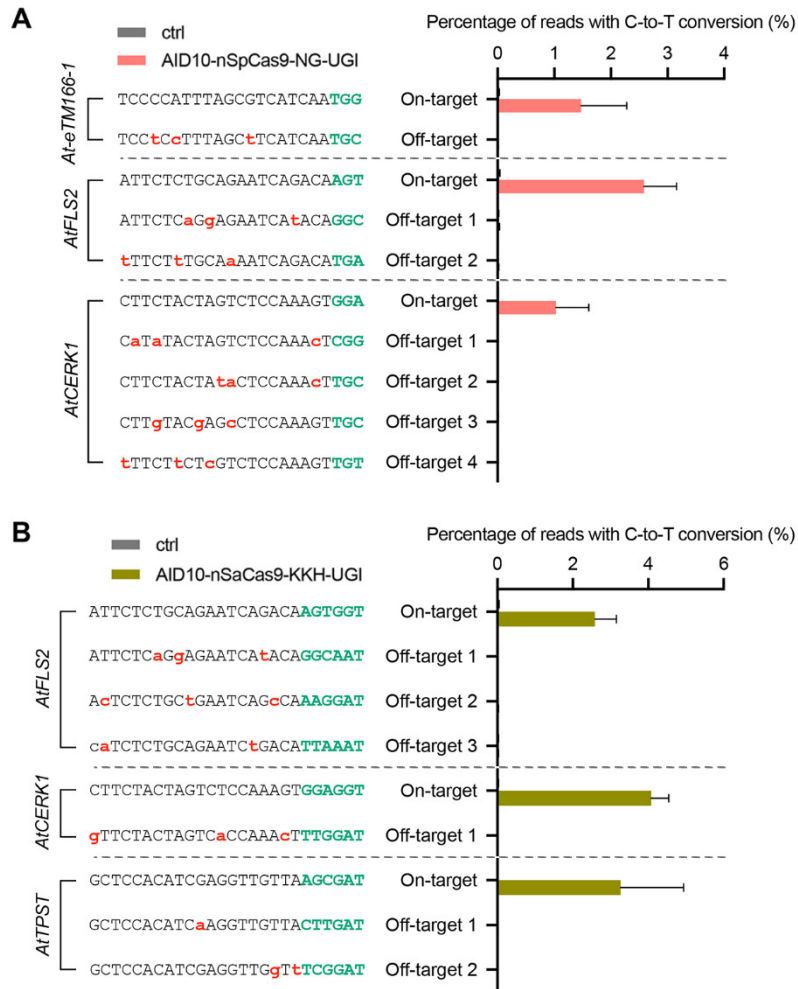

**Supplementary Figure S9. Amplicon deep sequencing reveals no guide-dependent off-target editing by AID10-nSpCas9-NG-UGI and AID10-nSaCas9-KKH-UGI in protoplasts.**

(A) No guide-dependent (no more than 3 base mismatches) off-target editing is detected for AID10-nSpCas9-NG-UGI when targeting the *At-eTM166-1*, *AtFLS2*, and *AtCERK1* sites. No potential off-target site was identified for the *AtTPST* site. (B) No guide-dependent (no more than 3 base mismatches) off-target editing is detected for AID10-nSaCas9-KKH-UGI when targeting the *AtFLS2*, *AtCERK1*, and *AtTPST* sites. No potential off-target site was identified for the *At-eTM166-1* site. Mismatches between off-target and on-target sites are highlighted in red. The PAM is shown in green. Data are shown as mean  $\pm$  s.d. of two biological replicates performed at different times.

*OsSLR1*

WT 5' --ACAACCCTCGGACCTCTCCTCCT**GGG**--3'

#11 { 5' --ACAACCCTCGGACCT**T**TCCTCCT**GGG**--3'  
5' --ACAACCCTCGGACCTCTCCTCCT**GGG**--3'

#15 { 5' --ACAA**T**TTCCTCGGACCTCTCCTCCT**GGG**--3'  
5' --ACAACCCTCGGACCTCTCCTCCT**GGG**--3'

#20 { 5' --ATAACCCTCGGACCTCTCCTCCT**GGG**--3'  
5' --ACAACCCTCGGACCTCTCCTCCT**GGG**--3'

**Supplementary Figure S10. Base editing at the *OsSLR1* locus by AID10-nCas9-AID10-UGI in transgenic rice plants.**

Three transgenic T0 rice lines containing cytosine changes at the *OsSLR1* target site were generated by AID10-nCas9-AID10-UGI. The target sequence is underlined and the PAM is in bold. C-to-T base substitutions are highlighted in red.

*OsCKX2*

WT    5' --GAGCTCAAGCTCCGCGCCGC**GGG**--3'

#3    { 5' --GAGCTCAAGCTCCG**T**GCCGC**GGG**--3'  
       5' --GAGCTCAAGCTCCGCGCCGC**GGG**--3'

#19    { 5' --GAGCTCAAGCTCCG**T**GCCGC**GGG**--3'  
       5' --GAGCTCAA-----GCGCCGC**GGG**--3'  
       5' --GAGCTCAAGCTCCGCGCCGC**GGG**--3'

**Supplementary Figure S11. Base editing at the *OsCKX2* locus by ABE7.10-nCas9-AID10 in transgenic rice plants.**

Two transgenic T0 rice lines edited by the dual base editor ABE7.10-nCas9-AID10 only contained cytosine changes at the *OsCKX2* target site. The line #19 contained chimeric mutations. The target sequence is underlined and the PAM is in bold. Base substitutions or deletions are highlighted in red.

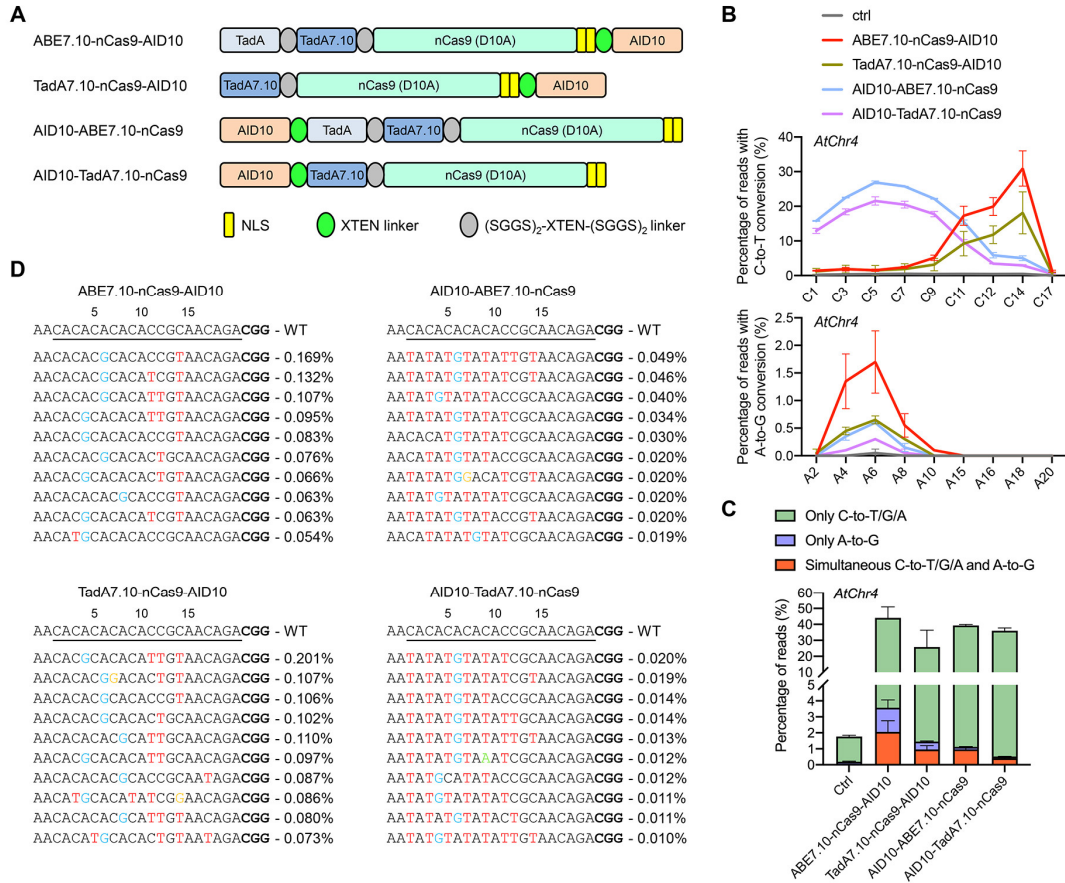

**Supplementary Figure S12. Simultaneous editing of cytosines and adenines at the same target sequence by AID10- and TadA7.10-based dual base editors.**

(A) Schematic diagram of four AID10- and TadA7.10-based dual base editors with different protein architectures. (B) Comparison of C-to-T (top) and A-to-G (bottom) editing efficiencies between the four dual base editors at the *AtChr4* locus in *Arabidopsis* protoplasts by amplicon deep sequencing. Data are shown as mean  $\pm$  s.d. of two biological replicates performed at different times. (C) Comparison of editing product compositions at the *AtChr4* locus generated by the four dual base editors. (D) The ten most abundant mutant alleles with concurrent C-to-T/G/A and A-to-G substitutions by individual dual base editors. Data of one replicate in (C) are shown. The A-to-G, C-to-T, C-to-G, and C-to-A substitutions are highlighted in blue, red, orange, and green, respectively.



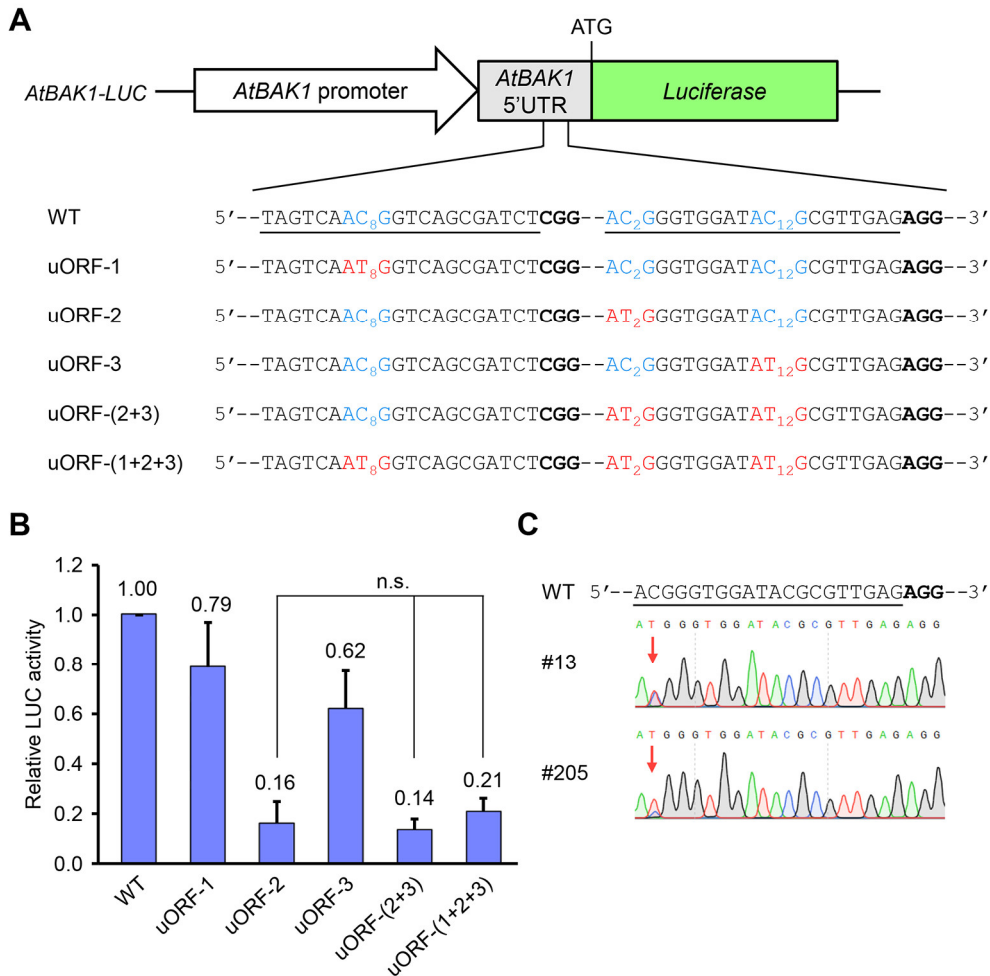

**Supplementary Figure S13. Luciferase reporter assay reflects inhibitory effects of different *AtBAK1* uORF mutations on the primary ORF.**

(A) Schematic diagram of six *AtBAK1-LUC* reporters containing no uORF (WT) or different combinations of uORF mutations in the 5' UTR of *AtBAK1*. Two possible target sequences in the 5' UTR that can be used to introduce the uORF mutations through base editing are underlined. Their PAMs are indicated in bold. The native ACG trinucleotides and the artificially created start codons are highlighted in blue and red, respectively, with subscripted numbers indicating the protospacer positions. (B) Inhibition of luciferase expression by different uORFs. The reporter constructs were transiently expressed in *Arabidopsis* protoplasts. Data are presented as means  $\pm$  s.d. of three biological replicates. n.s., not significant (two-tailed Student's *t* test). (C) Sanger sequencing chromatograms evidence the creation of uORF-2 in the 5' UTR of *AtBAK1* by AID10-nCas9-UGI in two transgenic T1 lines. Red arrows mark base substitutions.



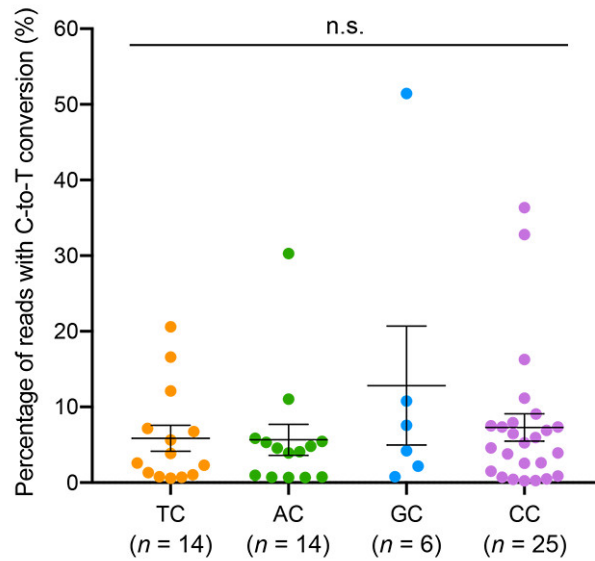

**Supplementary Figure S14. AID10 cytosine deaminase shows no sequence context bias in plant cells.**

C-to-T editing frequencies are shown as mean  $\pm$  s.e.m. with individual data points representing the average editing frequency of a single cytosine within the optimal activity window (positions -1–9) of each protospacer. Data shown in Figures 1C, 2B, and 3B for AID10-nCas9-UGI and in Figure 2D for AID10-nCas9-NG-UGI are used for this analysis. n.s., not statistically significant (one-way ANOVA with Tukey’s multiple comparisons test).

Supplementary Table S1. Summary of editing targets in this study

| Target site        | Gene ID or genomic location    | Target sequence (5'-3') <sup>1</sup> |
|--------------------|--------------------------------|--------------------------------------|
| <i>OsER1-T1</i>    | <i>LOC_Os06g10230</i>          | AGAACTCGAGTCGCAAGTCG <u>AGG</u>      |
| <i>OsER1-T2</i>    |                                | CACTCGCCTATGACATGTGG <u>TGG</u>      |
| <i>OsLAZY1</i>     | <i>LOC_Os11g29840</i>          | GCTGATCATATACACATATG <u>AGG</u>      |
| <i>OsGLI-1</i>     | <i>LOC_Os09g25850</i>          | CAAATACCTTGTACGCGCCG <u>AGG</u>      |
| <i>OsNAL1</i>      | <i>LOC_Os04g52479</i>          | ACCGTCACGACTGTAGTTAG <u>GGG</u>      |
|                    |                                | ACCGTCACGACTGTAGTTAG <u>GGGAGT</u>   |
|                    |                                | <u>TTTC</u> CACCGTCACGACTGTAGTTAGG   |
| <i>OsTCP21</i>     | <i>LOC_Os07g05720</i>          | ACCACACCCCTCCCTACGTTG <u>GGG</u>     |
|                    |                                | TAACCACACCCCTCCCTACGT <u>TGGGGT</u>  |
|                    |                                | <u>TTTG</u> TTGTAACCACACCCCTCCCTACGT |
| <i>OsALS</i>       | <i>LOC_Os02g30630</i>          | ATCTCCATGGACGCGCCGCC <u>CGG</u>      |
| <i>OsSWEET11</i>   | <i>LOC_Os08g42350</i>          | TGTACACCACCAAAGTGG <u>AGG</u>        |
| <i>OsSWEET13</i>   | <i>LOC_Os12g29220</i>          | GGAGTTGTGGTGCTTTATAT <u>AGG</u>      |
| <i>OsSWEET14</i>   | <i>LOC_Os11g31190</i>          | GCTTAGCACCTGGTTGGAGG <u>GGG</u>      |
| <i>OsSLR1</i>      | <i>LOC_Os03g49990</i>          | CCCCTCGGACCTCTCCTCCT <u>GGG</u>      |
| <i>OsIPA1</i>      | <i>LOC_Os08g39890</i>          | AGAGAGAGCACAGCTCGAGT <u>CGG</u>      |
| <i>OsCKX2</i>      | <i>LOC_Os01g10110</i>          | GAGCTCAAGCTCCGCGCCGC <u>GGG</u>      |
| <i>AtCNGC16</i>    | <i>At3g48010</i>               | CGCCACCCCTTCCTCTTCCTC <u>AGG</u>     |
| <i>AtMTA</i>       | <i>At4g10760</i>               | CCTCCCCACATCTCAGGTCT <u>CGG</u>      |
| <i>AtCER10</i>     | <i>At3g55360</i>               | ACCGAATCGGGGAGGTCAAG <u>GGG</u>      |
| <i>AtBIK1</i>      | <i>At2g39660</i>               | CGCCGGAAAAATGTCCATCC <u>TGG</u>      |
|                    |                                | CGCCGGAAAAATGTCCATCC <u>TGGAAT</u>   |
|                    |                                | <u>TTTC</u> AAGTAAACCGCCGGAAAAATGTC  |
| <i>AtHDC1</i>      | <i>At5g08450</i>               | CCTCTCCCGTTCCCACCTAT <u>CGG</u>      |
|                    |                                | TCCTCTCCCGTTCCCACCTA <u>TCGGAT</u>   |
|                    |                                | <u>TTTC</u> TGCTCCATCCTCTCCCGTTCCCA  |
| <i>AtABI3</i>      | <i>At3g24650</i>               | TGCACGAGAAGTGGCACACT <u>CGG</u>      |
|                    |                                | ATGCACGAGAAGTGGCACACT <u>TCGGGT</u>  |
| <i>At-eTM166-1</i> | <i>chr5:25327627..25327649</i> | TCCCCATTTAGCGTCATCAAT <u>TGG</u>     |
|                    | <i>chr5:25327624..25327649</i> | TCCCCATTTAGCGTCATCAAT <u>TGGAAT</u>  |
| <i>AtFLS2</i>      | <i>At5g46330</i>               | ATTCTCTGCAGAATCAGACA <u>AGT</u>      |
|                    |                                | ATTCTCTGCAGAATCAGACA <u>AGTGGT</u>   |
| <i>AtCERK1</i>     | <i>At3g21630</i>               | CTTCTACTAGTCTCCAAAGT <u>GGA</u>      |
|                    |                                | CTTCTACTAGTCTCCAAAGT <u>GGAGGT</u>   |

|                     |                                 |                                           |
|---------------------|---------------------------------|-------------------------------------------|
| <i>AtTPST</i>       | <i>At1g08030</i>                | GCTCCACATCGAGGTTGTTA <b><u>AGC</u></b>    |
|                     |                                 | GCTCCACATCGAGGTTGTTA <b><u>AGCGAT</u></b> |
| <i>AtBAK1</i>       | <i>At4g33430</i>                | CCTACACCGCCATCACCTGC <b><u>AGG</u></b>    |
| <i>AtBAK1-5'UTR</i> |                                 | ACGGGTGGATACGCGTTGAG <b><u>AGG</u></b>    |
| <i>AtChr3</i>       | <i>Chr3: 951091..951113</i>     | ACACACACACACACTCCTCT <b><u>AGG</u></b>    |
| <i>AtChr4</i>       | <i>Chr4: 18302232..18302254</i> | CACACACACACCGCAACAG <b><u>CGG</u></b>     |

<sup>1</sup> The PAM sequence is in bold and underlined. Sequences with a 3'-NGG or 3'-NGN PAM, a 3'-NNGRRT or 3'-NNNRRT PAM, and a 5'-TTTN PAM are targets for base editors derived from SpCas9, SaCas9 and LbCas12a, respectively, where "N" refers to any type of nucleotide and "R" stands for "A" or "G".

**Supplementary Table S2. Primers used for amplification of target sites in this study**

| <b>Primer name</b> | <b>Primer sequence (5'-3')</b>       | <b>Application</b>                                                            |
|--------------------|--------------------------------------|-------------------------------------------------------------------------------|
| OsER1-T1-F         | TTGAATACCGGAGTAAGGTGGTG              | RFLP assay analysis of the <i>OsER1-T1</i> site                               |
| OsER1-T1-R         | ATGGCCGATGGACACTGAGA                 |                                                                               |
| OsER1-T2-NGS-F     | NNNNNNCAGCTACTCGTAAGCTACACTTAT       | Amplicon deep sequencing of the <i>OsER1-T2</i> site                          |
| OsER1-T2-NGS-R     | TGGCCGATGGACACTGAGAT                 |                                                                               |
| OsNAL1-NGS-F       | NNNNNNTTGTACGAGCTGACGGTGCATT         | Amplicon deep sequencing of the <i>OsNAL1</i> site                            |
| OsNAL1-NGS-R       | GCATAGGCCATCACAGTCCCAG               |                                                                               |
| AtCNGC16-NGS-F     | NNNNNNGTGAAATCGCTATCCGTTAC           | Amplicon deep sequencing of the <i>AtCNGC16</i> site                          |
| AtCNGC16-NGS-R     | AAACCAAATCATTATCTGAGA                |                                                                               |
| AtMTA-NGS-F        | NNNNNNTGCATTTCCTCTTGGTGCATTC         | Amplicon deep sequencing of the <i>AtMTA</i> site                             |
| AtMTA-NGS-R        | GCCTAGGATCATGGTTTTAGC                |                                                                               |
| OsTCP21-NGS-F      | NNNNNNGCCAATCGCACGGTTTCTGC           | Amplicon deep sequencing of the <i>OsTCP21</i> site                           |
| OsTCP21-NGS-R      | GACATTGGGGGTTAGCGTCC                 |                                                                               |
| AtBIK1-NGS-F       | NNNNNNCACGTTTGTCCAGAACCGC            | Amplicon deep sequencing of the <i>AtBIK1</i> site                            |
| AtBIK1-NGS-R       | ACAACAACCTTCAGGACAACCTGGGA           |                                                                               |
| AtHDC1-NGS-F       | NNNNNNAGTCCTTGGCTCTCTTTTGATATGATCTTT | Amplicon deep sequencing of the <i>AtHDC1</i> site                            |
| AtHDC1-NGS-R       | AAGGTTGATGCCAAAAACGAAGATAGATT        |                                                                               |
| At-eTM166-NGS-F    | NNNNNNCGATGATGATGATGATGGAAGCTA       | Amplicon deep sequencing of the <i>At-eTM166-1</i> site                       |
| At-eTM166-NGS-R    | TAGTTCGACGATACATTCCATGAG             |                                                                               |
| AtFLS2-NGS-F       | NNNNNNACAAAGGTCAGCTAGAAGATGGG        | Amplicon deep sequencing of the <i>AtFLS2</i> site                            |
| AtFLS2-NGS-R       | AATGGTGTCTCCAAGTTTCCAT               |                                                                               |
| AtCERK1-NGS-F      | NNNNNNTGTCTCTTTTGTTAGCTGGGAGT        | Amplicon deep sequencing of the <i>AtCERK1</i> site                           |
| AtCERK1-NGS-R      | TGCATAGTAAACAGCCCCAAAAC              |                                                                               |
| AtTPST-NGS-F       | NNNNNNTCTAACAGACGCGTACAAGAGTT        | Amplicon deep sequencing of the <i>AtTPST</i> site                            |
| AtTPST-NGS-R       | TTAGACTGCACACGAATCATGGA              |                                                                               |
| AtBAK1-NGS-F       | NNNNNNGTTTTGCCAACACCAAGTTGACT        | Amplicon deep sequencing of the <i>AtBAK1</i> site                            |
| AtBAK1-NGS-R       | TAGAAGTGCAGCACCTGCAG                 |                                                                               |
| AtC3-NGS-F         | NNNNNNTCTTAATGTTGAACAAACCATCTAACC    | Amplicon deep sequencing of the <i>AtChr3</i> site                            |
| AtC3-NGS-R         | TATTGGCTAAGTGAAGTAATTTGAGATTAT       |                                                                               |
| AtC4-NGS-F         | NNNNNNCATTCAAACAAAAAGTTTTATCTACATCAC | Amplicon deep sequencing of the <i>AtChr4</i> site                            |
| AtC4-NGS-R         | GAATTGTTTGTTTTTCTTTTTTACATGTACT      |                                                                               |
| AtCERK1-Sp-OT1-F   | NNNNNNGGACTTAGCCCTCTCAAACCA          | Amplicon deep sequencing of the <i>AtCERK1</i> off-target site 1 of SpCas9-NG |
| AtCERK1-Sp-OT1-R   | GCCCGTGATGCATTAAGCTTTTA              |                                                                               |
| AtCERK1-Sp-OT2-F   | NNNNNNCAGTAGCGACGTGGTCTTGA           | Amplicon deep sequencing of the <i>AtCERK1</i> off-target site 2 of SpCas9-NG |
| AtCERK1-Sp-OT2-R   | GCCGAATTCGATACGGATTACC               |                                                                               |

|                    |                                                   |                                                                                             |
|--------------------|---------------------------------------------------|---------------------------------------------------------------------------------------------|
| AtCERK1-Sp-OT3-F   | NNNNNNTGCTGTAGACTCTTGGTTTGCT                      | Amplicon deep sequencing of the <i>AtCERK1</i> off-target site 3 of SpCas9-NG               |
| AtCERK1-Sp-OT3-R   | ATTGGTCATGGCGTAGCTGT                              |                                                                                             |
| AtCERK1-Sp-OT4-F   | NNNNNNCAAGACCCAGCCTAGCGAAG                        | Amplicon deep sequencing of the <i>AtCERK1</i> off-target site 4 of SpCas9-NG               |
| AtCERK1-Sp-OT4-R   | AAGCAGCAGACTCGTCATCTC                             |                                                                                             |
| AtCERK1-Sa-OT1-F   | NNNNNNTCGAGTTTACCCGCATGTTTC                       | Amplicon deep sequencing of the <i>AtCERK1</i> off-target site 1 of SaCas9-KKH              |
| AtCERK1-Sa-OT1-R   | GATGCATAGACTTAAAATTCCACC                          |                                                                                             |
| AtFLS2-Sa_Sp-OT1-F | NNNNNNTGCCAGAGATTTCCAGAGGC                        | Amplicon deep sequencing of the <i>AtFLS2</i> off-target site 1 of SpCas9-NG and SaCas9-KKH |
| AtFLS2-Sa_Sp-OT1-R | TCTCCAGTTTCTTGGAACGCA                             |                                                                                             |
| AtFLS2-Sp-OT2-F    | NNNNNNTTATCTTCATCGACTCTTCTCCTT                    | Amplicon deep sequencing of the <i>AtFLS2</i> off-target site 2 of SpCas9-NG                |
| AtFLS2-Sp-OT2-R    | AGCTTCCATCGTTAGTCACAA                             |                                                                                             |
| AtFLS2-Sa-OT2-F    | NNNNNNTCGTTTAGGGGAATCGGACAA                       | Amplicon deep sequencing of the <i>AtFLS2</i> off-target site 2 of SaCas9-KKH               |
| AtFLS2-Sa-OT2-R    | TCGTCTGTTAATTAGCACCATTCA                          |                                                                                             |
| AtFLS2-Sa-OT3-F    | NNNNNNTGTCATCGAGATCACACTTGAAGA                    | Amplicon deep sequencing of the <i>AtFLS2</i> off-target site 3 of SaCas9-KKH               |
| AtFLS2-Sa-OT3-R    | CACACTCTCATTCTATCTTTCTTCTCTT                      |                                                                                             |
| At-eTM166-Sp-OT1-F | NNNNNNCTGTCCTCACCAACCACCAG                        | Amplicon deep sequencing of the <i>At-eTM166-1</i> off-target site 1 of SpCas9-NG           |
| At-eTM166-Sp-OT1-R | GAGAGGTTGCAGGAGAACCC                              |                                                                                             |
| AtTPST-Sa-OT1-F    | NNNNNNTGACACAGGTGAGTGAGAGC                        | Amplicon deep sequencing of the <i>AtTPST</i> off-target site 1 of SaCas9-KKH               |
| AtTPST-Sa-OT1-R    | CGACAAACAGGGACGCAATG                              |                                                                                             |
| AtTPST-Sa-OT2-F    | NNNNNNGTGGATTTGCAGTTTCCGACC                       | Amplicon deep sequencing of the <i>AtTPST</i> off-target site 2 of SaCas9-KKH               |
| AtTPST-Sa-OT2-R    | AAAGCGACGTCGTCTCGG                                |                                                                                             |
| OsLAZY1-HiTOM-F    | GGAGTGAGTACGGTGTGCCCTCCGGTGTGAACTCTT<br>TGAA      | HiTOM sequencing of the <i>OsLAZY1</i> site                                                 |
| OsLAZY1-HiTOM-R    | GAGTTGGATGCTGGATGGTAGCTGATCATGCTTTCTG<br>GGTTGAAT |                                                                                             |
| OsLAZY1-F          | TCTTAGCACGCTAAACCGGC                              | Sanger sequencing of the <i>OsLAZY1</i> site                                                |
| OsLAZY1-R          | AGTGCGTTTGTGTTACGAGC                              |                                                                                             |

|                       |                                                  |                                                     |
|-----------------------|--------------------------------------------------|-----------------------------------------------------|
| OsGL1-1-HiTOM-F       | GGAGTGAGTACGGTGTGCAGGACGAAGAAGAAGATC<br>AAGC     | HiTOM sequencing of the<br><i>OsGL1-1</i> site      |
| OsGL1-1-HiTOM-R       | GAGTTGGATGCTGGATGGCACATACTGCGCACACACA<br>AT      |                                                     |
| OsGL1-1-F             | AACATCTTCTAACTCCCCTCACG                          | Sanger sequencing of the<br><i>OsGL1-1</i> site     |
| OsGL1-1-R             | TGCACCTGCAGTATCAAGAAGTT                          |                                                     |
| AtCER10-HiTOM-F       | GGAGTGAGTACGGTGTGCTTAAGCACCATGAAGGTCA<br>CCG     | HiTOM sequencing of the<br><i>AtCER10</i> site      |
| AtCER10-HiTOM-R       | GAGTTGGATGCTGGATGGCGAAGCACAAAACACACG<br>AAAT     |                                                     |
| AtCER10-F             | GGTGGATCCTTAAAACAAAGCCA                          | Sanger sequencing of the<br><i>AtCER10</i> site     |
| AtCER10-R             | CGAAGCACAAAACACACGAAATC                          |                                                     |
| AtHDC1-HiTOM-F        | GGAGTGAGTACGGTGTGCCCCAAAGAGATTGGAAGA<br>GAAG     | HiTOM sequencing of the<br><i>AtHDC1</i> site       |
| AtHDC1-HiTOM-R        | GAGTTGGATGCTGGATGGTTCTCAGCACCAGTCCTTG<br>G       |                                                     |
| AtHDC1-F              | CCCAAAGAGATTGGAAGAGAAG                           | Sanger sequencing of the<br><i>AtHDC1</i> site      |
| AtHDC1-R              | TTCTCAGCACCAGTCCTTGG                             |                                                     |
| AtABI3-HiTOM-F        | GGAGTGAGTACGGTGTGCGTACCAAATAAGAAAGAG<br>GG       | HiTOM sequencing of the<br><i>AtABI3</i> site       |
| AtABI3-HiTOM-R        | GAGTTGGATGCTGGATGGCCAGAAATATAACACAAA<br>CACC     |                                                     |
| AtABI3-F              | GTACCAAATAAGAAAGAGGG                             | Sanger sequencing of the<br><i>AtABI3</i> site      |
| AtABI3-R              | ACGATATGTAAGCTCGACTC                             |                                                     |
| At-eTM166-HiTOM<br>-F | GGAGTGAGTACGGTGTGCATTTCCTTTCAAATAAAGG<br>TCG     | HiTOM sequencing of the<br><i>At-eTM166-1</i> site  |
| At-eTM166-HiTOM<br>-R | GAGTTGGATGCTGGATGGATGATGATGATGATGGAAG<br>C       |                                                     |
| At-eTM166-F           | ATTCCTTTCAAATAAAGGTGC                            | Sanger sequencing of the<br><i>At-eTM166-1</i> site |
| At-eTM166-R           | ATGATGATGATGATGGAAGC                             |                                                     |
| OsALS-HiTOM-F         | GGAGTGAGTACGGTGTGCCGCCGCGAACGCCTCG               | HiTOM sequencing of the<br><i>OsALS</i> site        |
| OsALS-HiTOM-R         | GAGTTGGATGCTGGATGGCGGCCGAGCCCCGCAA               |                                                     |
| OsALS-F               | CACCACCCACCATGGCT                                | Sanger sequencing of the<br><i>OsALS</i> site       |
| OsALS-R               | GTCCTCCACATCAAGGACAAGGTAA                        |                                                     |
| OsSWEET11-HiTO<br>M-F | GGAGTGAGTACGGTGTGCAGTGAAAAAGAAATATCA<br>AGCACAAG | HiTOM sequencing of the<br><i>OsSWEET11</i> site    |
| OsSWEET11-HiTO<br>M-R | GAGTTGGATGCTGGATGGAGGTGTTAATCAGTGAGAA<br>GGTTAG  |                                                     |
| OsSWEET11-F           | TGATTGCACACGAACACTACTCTG                         | Sanger sequencing of the<br><i>OsSWEET11</i> site   |
| OsSWEET11-R           | GCAATGGTGCAGACAACAATA                            |                                                     |

|                      |                                                |                                                     |
|----------------------|------------------------------------------------|-----------------------------------------------------|
| OsSWEET13-HiTOM-F    | GGAGTGAGTACGGTGTGCGAGGGAGAGCTCTGAAGAA<br>GA    | HiTOM sequencing of the<br><i>OsSWEET13</i> site    |
| OsSWEET13-HiTOM-R    | GAGTTGGATGCTGGATGGCTCCAACAGTAGCTCATT<br>TTGTAA |                                                     |
| OsSWEET13-F          | TCGATCTCTACTGACAATGCAC                         | Sanger sequencing of the<br><i>OsSWEET13</i> site   |
| OsSWEET13-R          | AGTACCATCCATATTGCCTTCG                         |                                                     |
| OsSWEET14-HiTOM-F    | GGAGTGAGTACGGTGTGCGCTGGTAATCAGCTACTAC<br>TTG   | HiTOM sequencing of the<br><i>OsSWEET14</i> site    |
| OsSWEET14-HiTOM-R    | GAGTTGGATGCTGGATGGGTGCTGATGATTATCTT            |                                                     |
| OsSWEET14-F          | GCCCAACTCTAGATCCCTTAAC                         | Sanger sequencing of the<br><i>OsSWEET14</i> site   |
| OsSWEET14-R          | CCACTCACAATTGCATCCAAAA                         |                                                     |
| OsSLR1-HiTOM-F       | GGAGTGAGTACGGTGTGCCGCGGATGACGGGTTTCG           | HiTOM sequencing of the<br><i>OsSLR1</i> site       |
| OsSLR1-HiTOM-R       | GAGTTGGATGCTGGATGGTGAAGCATGGCGGG               |                                                     |
| OsSLR1-F             | GCCGCGGATGACGGGTTTCG                           | Sanger sequencing of the<br><i>OsSLR1</i> site      |
| OsSLR1-R             | GGTGAAGCATGGCGGG                               |                                                     |
| OsCKX2-HiTOM-F       | GGAGTGAGTACGGTGTGCGCGCGGGTTCGTGTTTCG           | HiTOM sequencing of the<br><i>OsCKX2</i> site       |
| OsCKX2-HiTOM-R       | GAGTTGGATGCTGGATGGGATGCCGTGGAAGACGC            |                                                     |
| OsCKX2-F             | ATCCGAGAAGATCCTGCATG                           | Sanger sequencing of the<br><i>OsCKX2</i> site      |
| OsCKX2-R             | CTTAGTACACACTATTTGCAGTCAA                      |                                                     |
| OsIPA1-HiTOM-F       | GGAGTGAGTACGGTGTGCGCTGGTGGTAGTGGACATG<br>G     | HiTOM sequencing of the<br><i>OsIPA1</i> site       |
| OsIPA1-HiTOM-R       | GAGTTGGATGCTGGATGGTCGCTGGCCCAAATCTCCC<br>T     |                                                     |
| OsIPA1-F             | GTTCCAAGCAGCGTAAGGAATG                         | Sanger sequencing of the<br><i>OsIPA1</i> site      |
| OsIPA1-R             | AGACTTCATGTGGTAGCTGGTG                         |                                                     |
| AtBAK1-5'UTR-HiTOM-F | GGAGTGAGTACGGTGTGCGGAAATATCTTCTTCCTCC<br>TTTCG | HiTOM sequencing of the<br><i>AtBAK1-5'UTR</i> site |
| AtBAK1-5'UTR-HiTOM-R | GAGTTGGATGCTGGATGGTCGATTAAGCTACCACCCA<br>CA    |                                                     |
| AtBAK1-5'UTR-F       | GGAAATATCTTCTTCCTCCTTTCG                       | Sanger sequencing of the<br><i>AtBAK1</i> site      |
| AtBAK1-5'UTR-R       | TATCCTCAAGAGATTA AAAACAAACCC                   |                                                     |

**Supplementary Table S3. Primers used for qPCR analysis in this study**

| <b>Primer name</b> | <b>Primer sequence (5'-3')</b> |
|--------------------|--------------------------------|
| AtPHV-qPCR-F       | CTGAGTGTTGACAAGCTCGA           |
| AtPHV-qPCR-R       | TCTTCTCTCGATTGCGGA             |
| AtPHB-qPCR-F       | AGGAGCATACATCTGCGTGT           |
| AtPHB-qPCR-R       | TTTCTATAGCAGAGGAGGCC           |
| AtCNA-qPCR-F       | CAGCCAGAAATCGCGTGGT            |
| AtCNA-qPCR-R       | CAGCACCAATTGGCATCTCAA          |



**Supplementary Table S4. Summary of base editing outcomes in transgenic *Arabidopsis* T1 and rice T0 plants**

| Target gene        | Base editor (BE)      | Promoter for BE expression | No. of transgenic plants | Genotype and No. <sup>1</sup> | Base editing efficiency <sup>2</sup> | Indel ratio <sup>3</sup> |
|--------------------|-----------------------|----------------------------|--------------------------|-------------------------------|--------------------------------------|--------------------------|
| <i>OsLAZY1</i>     | APOBEC1-nCas9-UGI     | <i>ZmUbi</i>               | 40                       | 11WT/7Homo/3Het/15Bi/4Chi     | 65.0% (26/40)                        | 42.5% (17/40)            |
|                    | AID10-nCas9-UGI       | <i>ZmUbi</i>               | 33                       | 8WT/4Homo/1Het/14Bi/6Chi      | 72.7% (24/33)                        | 21.2% (7/33)             |
| <i>OsGL1-1</i>     | APOBEC1-nCas9-UGI     | <i>ZmUbi</i>               | 27                       | 12WT/4Homo/2Het/8Bi/1Chi      | 51.9% (14/27)                        | 11.1% (3/27)             |
|                    | AID10-nCas9-UGI       | <i>ZmUbi</i>               | 47                       | 7WT/5Homo/16Het/18Bi/1Chi     | 83.0% (39/47)                        | 14.9% (7/47)             |
| <i>AtCER10</i>     | APOBEC1-nCas9-UGI     | <i>ZmUbi</i>               | 42                       | 14WT/28Chi                    | 64.3% (27/42)                        | 4.8% (2/42)              |
|                    | AID10-nCas9-UGI       | <i>ZmUbi</i>               | 34                       | 2WT/32Chi                     | 94.1% (32/34)                        | 0% (0/34)                |
|                    | AID10-nCas9-UGI       | <i>EC1.2en-EC1.1p</i>      | 157                      | 153WT/4Het                    | 2.5% (4/157)                         | 0% (0/157)               |
| <i>AtHDC1</i>      | AID10-nCas9-UGI       | <i>EC1.2en-EC1.1p</i>      | 118                      | 108WT/8Het/2Bi                | 8.5% (10/118)                        | 0% (0/118)               |
|                    | AID10-nSaCas9-UGI     | <i>EC1.2en-EC1.1p</i>      | 57                       | 54WT/1Homo/2Het               | 5.3% (3/57)                          | 0% (0/57)                |
| <i>AtABI3</i>      | AID10-nCas9-UGI       | <i>EC1.2en-EC1.1p</i>      | 107                      | 103WT/4Het                    | 3.7% (4/107)                         | 0% (0/107)               |
|                    | AID10-nSaCas9-UGI     | <i>EC1.2en-EC1.1p</i>      | 101                      | 75WT/2Homo/16Het/6Bi/2Chi     | 17.8% (18/101)                       | 9.9% (10/101)            |
| <i>At-eTM166-1</i> | AID10-nCas9-UGI       | <i>EC1.2en-EC1.1p</i>      | 71                       | 63WT/3Het/5Bi                 | 11.3% (8/71)                         | 0% (0/71)                |
|                    | AID10-nSaCas9-UGI     | <i>EC1.2en-EC1.1p</i>      | 139                      | 139WT                         | 0% (0/139)                           | 0% (0/139)               |
| <i>OsALS</i>       | nCas9-AID10-UGI       | <i>ZmUbi</i>               | 39                       | 33WT/5Het/1Bi                 | 12.8% (5/39)                         | 2.6% (1/39)              |
| <i>OsSWEET11</i>   | AID10-nCas9-AID10-UGI | <i>ZmUbi</i>               | 77                       | 38WT/3Homo/14Het/20Bi/2Chi    | 36.4% (28/77)                        | 26.0% (20/77)            |
| <i>OsSWEET13</i>   | AID10-nCas9-AID10-UGI | <i>ZmUbi</i>               | 77                       | 69WT/1Homo/6Het/1Bi           | 9.1% (7/77)                          | 0% (0/77)                |

|                     |                       |                       |     |                            |               |               |
|---------------------|-----------------------|-----------------------|-----|----------------------------|---------------|---------------|
| <i>OsSWEET14</i>    | AID10-nCas9-AID10-UGI | <i>ZmUbi</i>          | 77  | 38WT/2Homo/11Het/21Bi/5Chi | 41.6% (32/77) | 26.0% (20/77) |
| <i>OsSLR1</i>       | AID10-nCas9-AID10-UGI | <i>ZmUbi</i>          | 56  | 52WT/4Het                  | 5.4% (3/56)   | 1.8% (1/56)   |
| <i>OsIPA1</i>       | ABE7.10-nCas9-AID10   | <i>ZmUbi</i>          | 29  | 29WT                       | 0% (0/29)     | 0% (0/29)     |
| <i>OsCKX2</i>       | ABE7.10-nCas9-AID10   | <i>ZmUbi</i>          | 23  | 21WT/1Het/1Chi             | 8.7% (2/23)   | 4.3% (1/23)   |
| <i>AtBAK1-5'UTR</i> | AID10-nCas9-UGI       | <i>ECl.2en-ECl.1p</i> | 325 | 320WT/5Het                 | 1.5% (5/325)  | 0% (0/325)    |

<sup>1</sup> Homo, Het, Bi, and Chi represent homozygote, heterozygote, biallele, and chimera, respectively.

<sup>2</sup> Base editing efficiency is defined as the ratio of the number of transgenic lines with base substitution(s) to the number of total lines.

<sup>3</sup> Indel ratio is the percentage of transgenic lines with nucleotide insertion or deletion (indel). Numbers of plants with indels to total transgenic plants are given in parentheses.

**Supplementary Table S5. Summary of base editors developed in this study**

| <b>Base editor</b>    | <b>Cas effector</b> | <b>PAM</b> | <b>Optimal editing window<sup>1</sup></b>                         | <b>Possible editing window<sup>1</sup></b>                        |
|-----------------------|---------------------|------------|-------------------------------------------------------------------|-------------------------------------------------------------------|
| AID10-nCas9-UGI       | nSpCas9             | NGG        | C <sub>-1</sub> -C <sub>9</sub>                                   | C <sub>-5</sub> -C <sub>15</sub>                                  |
| AID10-nCas9-NG-UGI    | nSpCas9-NG          | NG         | C <sub>-1</sub> -C <sub>9</sub>                                   | C <sub>-5</sub> -C <sub>15</sub>                                  |
| AID10-nSaCas9-UGI     | nSaCas9             | NNGRRT     | C <sub>-2</sub> -C <sub>12</sub>                                  | C <sub>-5</sub> -C <sub>16</sub>                                  |
| AID10-nSaCas9-KKH-UGI | nSaCas9-KKH         | NNNRRT     | C <sub>-2</sub> -C <sub>12</sub>                                  | C <sub>-5</sub> -C <sub>16</sub>                                  |
| nCas9-AID10-UGI       | nSpCas9             | NGG        | C <sub>12</sub> -C <sub>14</sub>                                  | C <sub>12</sub> -C <sub>14</sub>                                  |
| AID10-nCas9-AID10-UGI | nSpCas9             | NGG        | C <sub>-1</sub> -C <sub>14</sub>                                  | C <sub>-1</sub> -C <sub>14</sub>                                  |
| ABE8e-nCas9-AID10-UGI | nSpCas9             | NGG        | A <sub>4</sub> -A <sub>8</sub> , C <sub>11</sub> -C <sub>14</sub> | A <sub>2</sub> -A <sub>8</sub> , C <sub>9</sub> -C <sub>14</sub>  |
| AID10-ABE8e-nCas9-UGI | nSpCas9             | NGG        | A <sub>4</sub> -A <sub>8</sub> , C <sub>-1</sub> -C <sub>11</sub> | A <sub>2</sub> -A <sub>8</sub> , C <sub>-1</sub> -C <sub>14</sub> |

<sup>1</sup> The subscripted numbers represent the protospacer positions, counting the PAM as 21–23.

**Supplementary Sequence. Amino acid sequences of base editors tested in this study.**

**AID10-dCas9**

(NLS-AID10-XTEN-dCas9-NLS-2×FLAG)

MAPKKKRKVG IHGVPAADSLLMNRREFLYQFKNVRWAKGRRETYLCYVVERRDCATSFSLDF  
GYLRNKNKGCHVELLFLRYISDWDLDPGRCYRVTFWISWSPCYDCARHVADFLRGPNLSLRI  
FAARLYFCEDRKAEPEGLRRLRRAGVQIAIMTFKDYFYCWNTFAENHGRTFKAWEGLHENS  
VRLSGQLRRILSGSETPGTSESATPESDKKYSIGLAIGTNSVGWAVITDEYKVPSSKFKVLGN  
TDRHSIKKNLIGALLFDSGETAEATRLKRTARRRYTRKKNRICYLQEIFSNEMAKVDDSDFFH  
RLEESFLVEEDKKHERHPIFGNIVDEVAYHEKYPTIYHLRKKLVDSTDKADLRLIYLALAHM  
IKFRGHFLIEGDLNPNDSVDKLFIQLVQTYNQLFEENPINASGVDAKAILSARLSKSRRL  
NLIAQLPGEKKNGLFGNLIASLGLTPNFKSNFDLAEDAQLQSKDQYDDDLNLLAQIGDQ  
YADLFLAAKNLSDAILLSDILRVNTEITKAPLSASMIKRYDEHHQDLTLLKALVRQQLPEKY  
KEIFFDQSKNGYAGYIDGGASQEEFYKFIKPILEKMDGTEELLVKNREDLLRKQRTFDNGS  
IPHQIHLGELHAILRRQEDFYFPLKDNREKIEKILTFRIPYYVGPLARGNSRFAMWTRKSEE  
TITPWNFEVVDKASQAQSFIERMTNFDKNLPNEKVLPKHSLLEYFTVYNELTKVKYVTEG  
MRKPAFLSGEQKKAIVDLLFKTNRKVTVKQLKEDYFKKIECFDSVEISGVEDRFNASLGT  
YH DLLKI IKDKDFLDNEENEDILEDIVLTLTLFEDREMIEERLKYAHLFDDKVMKQLKRRRYT  
GWGRLSRKLINGIRDKQSGKTILDFLKSDFANRNFQMLIHDDSLTFKEDIQKAQVSGQGDS  
LHEHIANLAGSPAIAKKGILQTVKVVDELVKVMGRHKPENIVIAMARENQTTQKGQKNSRERM  
KRIIEGIKELGSQILKEHPVENTQLQNEKLYLYLQNGRDMYVDQELDINRLSDYDVAIVP  
QSFLKDDSIDNKVLTRSDKNRGKSDNVPSEEVVKKMKNYWRQLLNAKLITQRKFDNLT  
KAER GGLSELKAGFIKRQLVETRQITKHVAQILDSRMNTKYDENDKLIREVKVITLKS  
KLVSDFR KDFQFYKVREINNYHHAHDAYLNAVVGTAIIKKYPKLESEFVYGDYKVYDVR  
KMIKSEQEI GKATAKYFFYSNIMNFFKTEITLANGEIRKRPLIETNGETGEIVWDKGRDF  
ATVRKVL SMPQ VNIVKKTVEVQTGGFSKESILPKRNSDKLIARKKDWDPKKYGGFDSPT  
VAYSVLVVAKVEK GK SKKLKSVKELLGITIMERSSSFENPIDFLEAKGYKEVKKDLI  
IKLPKYSLFELENGRKRMLA SAGELQKGNELALPSKYVNFLYLASHYEKLGSPEDNEQKQ  
LFVEQHKHYLDEIIEQISEFS KRVI LADANL DKVLSAYNKHRDKPIREQAENI  
IHLFTLTNLGAPAAFKYFDTTIDRKRYTST KEVL DATLIHQSI TGLYETRIDL  
SQLGGDKRPAATKKAGQAKKKRPPPSDYKDDDDKDYKD DDDK\*

**AID10-dCas9-UGI**

(NLS-AID10-XTEN-dCas9-(GGG)<sub>6</sub> linker-UGI-NLS-2×FLAG)

MAPKKKRKVG IHGVPAADSLLMNRREFLYQFKNVRWAKGRRETYLCYVVERRDCATSFSLDF  
GYLRNKNKGCHVELLFLRYISDWDLDPGRCYRVTFWISWSPCYDCARHVADFLRGPNLSLRI  
FAARLYFCEDRKAEPEGLRRLRRAGVQIAIMTFKDYFYCWNTFAENHGRTFKAWEGLHENS  
VRLSGQLRRILSGSETPGTSESATPESDKKYSIGLAIGTNSVGWAVITDEYKVPSSKFKVLGN  
TDRHSIKKNLIGALLFDSGETAEATRLKRTARRRYTRKKNRICYLQEIFSNEMAKVDDSDFFH  
RLEESFLVEEDKKHERHPIFGNIVDEVAYHEKYPTIYHLRKKLVDSTDKADLRLIYLALAHM  
IKFRGHFLIEGDLNPNDSVDKLFIQLVQTYNQLFEENPINASGVDAKAILSARLSKSRRL  
NLIAQLPGEKKNGLFGNLIASLGLTPNFKSNFDLAEDAQLQSKDQYDDDLNLLAQIGDQ  
YADLFLAAKNLSDAILLSDILRVNTEITKAPLSASMIKRYDEHHQDLTLLKALVRQQLPEKY



VNIVKKTEVQTGGFSKESILPKRNSDKLIARKKDWDPKKYGGFDSPTVAYSVLVVAKVEKGGK  
SKKLKSVKELLGITIMERSSEFEKNPIDFLEAKGYKEVKKDLI IKLPKYSLFELENGRKRMLA  
SAGELQKGNELALPSKYVNFLYLASHYEKLGKSPEDNEQKQLFVEQHKHYLDEIIEQISEFS  
KRVILADANLDKVL SAYNKHRDKPIREQAENI IHLFTLTNLGAPAAFKYFDTTIDRKRYTST  
KEVL DATLIHQSI TGLYETRIDLSQLGGDKRPAATKKAGQAKKKRPPPSDYKDDDDKDYKD  
DDDK\*

### AID10-nCas9-UGI

(NLS-AID10-XTEN-nCas9-(GGG)<sub>6</sub> linker-UGI-NLS-2×FLAG)

MAPKKRKRKVGIHGVPAADSLLMNRREFLYQFKNVRWAKGRRETYLCYVVERRDCATSFSLDF  
GYLRNKNKGCHVELLFLRYISDWDLDPGRCYRVTFWISWSPCYDCARHVADFLRGNPNLSLRI  
FAARLYFCEDRKAPEPEGLRRLRRAGVQIAIMTFKDYFYCWNTFAENHGRTFKAWEGLHENS  
RLSGQLRRILSGSETPGTSESATPESDKKYSIGLAIGTNSVGWAVITDEYKVPKPKFKVLGN  
TDRHSIKKNLIGALLFDSGETAEATRLKRTARRRYTRKRNRYCYLQEIFSNEMAKVDDSDFFH  
RLEESFLVEEDKKHERHPIFGNIVDEVAYHEKYPTIYHLRKKLVDSTDKADLRLIYLALAHM  
IKFRGHFLIEGDLNPNDSVDKLFIQLVQTYNQLFEENPINASGVDAKAILSARLSKSRLE  
NLIAQLPGEKKNLFGNLIALSGLTPNFKSNFDLAEDAKLQLSKDITYDDDLNLLAQIGDQ  
YADLFLAAKNLSDAILLSDILRVNTEITKAPLSASMIKRYDEHHQDLTLLKALVRQQLPEKY  
KEIFFDQSKNGYAGYIDGGASQEEFYKFIKPILEKMDGTEELLVKNLREDLLRQRTFDNGS  
IPHQIHLGELHAILRRQEDFYFPLKDNREKIEKILTFRIPIYYVGPLARGNSRFAMWTRKSEE  
TITPWNFEVVDKGSASQSFIERMTNFDKNLPNEKVLPHKSLLEYFTVYNELTKVKYVTEG  
MRKPAFLSGEQKKAIVDLLFKTNRKVTVKQLKEDYFKKIECFDSVEISGVEDRFNASLGTYH  
DLLKIKDKDFLDNEENEDILEDIVLTLTLFEDREMIEERLKYAHLFDDKVMKQLKRRRYT  
GWGRLSRKLINGIRDKQSGKTILDFLKSDFANRNFMLIHDDSLTFKEDIQKAQVSGQGDS  
LHEHIANLAGSPAIKKGI LQTVKVVDELVKVMGRHKPENIVIEMARENQTTQKGQKNSRERM  
KRIIEGKELGSQILKEHPVENTQLQNEKLYLYLQNGRDMYVDQELDINRLSDYDVDHIVP  
QSFLKDDSIDNKVLTRSDKNRGKSDNVPSEEVVKKMKNYWRQLLNAKLITQRKFDNLTKAER  
GGLSELDKAGFIKRQLVETRQITKHVAQILDSRMNTKYDENDKLIREVKVITLKSCLVSDFR  
KDFQFYKVREINNYHHAHDAYLNAVVG TALIKKYPKLESEFVYGDYKVYDVRKMIKSEQEI  
GKATAKYFFYSNIMNFFKTEITLANGEIRKRPLIETNGETGEIVWDKGRDFATVRKVL SMPQ  
VNIVKKTEVQTGGFSKESILPKRNSDKLIARKKDWDPKKYGGFDSPTVAYSVLVVAKVEKGGK  
SKKLKSVKELLGITIMERSSEFEKNPIDFLEAKGYKEVKKDLI IKLPKYSLFELENGRKRMLA  
SAGELQKGNELALPSKYVNFLYLASHYEKLGKSPEDNEQKQLFVEQHKHYLDEIIEQISEFS  
KRVILADANLDKVL SAYNKHRDKPIREQAENI IHLFTLTNLGAPAAFKYFDTTIDRKRYTST  
KEVL DATLIHQSI TGLYETRIDLSQLGGDGGGGSGGGSGGGSGGGSGGGSGGGSGGGSTNL  
SDIEKETGKQLVIQESILMLPEEVEEVIGNKPESDILVHTAYDESTDENVMLLTSDAPEYK  
PWALVIQDSNGENKIKMLS GGSKRPAATKKAGQAKKKRPPPSDYKDDDDKDYKDDDDK\*

### AtCDA1-nCas9-UGI

(NLS-AtCDA1-XTEN-nCas9-NLS-UGI-NLS)

MPKKRKRKVMKPSFVIQSKEAESAAKQLGVSVIQLLPSLVKPAQSYARTPISKFNVAVVGLG  
SSGRIFLGVNVEFPNLPLHHSIHAEQFLVTNLTLNGERHLNFFAVSAAPCGHCRQFLQEIRD  
APEIKILITDPNNSADSDSAADSDFLRLGSLPHRFGPDDLKGDHPLLESHDNHLKISD

LDSICNGNTDSSADLKQTALAAANRSYAPYSLCPSGVSLVDCDGKVYRGWYMESAAYNPSMG  
PVQAALVDYVANGGGGGYERIVGAVLVEKEDAVVRQEHTARLLETISPCKEFKVFHCYEAS  
GSETPGTSESATPELKDKKYSIGLAIGTNSVGWAVITDEYKVPSSKFKVLGNTDRHSIKKNL  
IGALLFDSGETAEATRLKRTARRRYTRRKNRICYLQEIFSNEMAKVDDSFHRLEESFLVEE  
DKKHERHPIFGNIVDEVAYHEKYPTIYHLRKKLVDSTDKADLRLIYLALAHMIKFRGHFLIE  
GDLNPDNSDVKLFIQLVQTYNQLFEENPINASGVDAKAILSARLSKSRLENLIAQLPGEK  
KNGLFGNLIASLSGLTPNFKSNFDLAEDAKLQLSKDTYDDDLNLLAQIGDQYADLFLAAKN  
LSDAILLSDILRVNTEITKAPLSASMIKRYDEHHQDLTLLKALVRQQLPEKYKEIFFDQSKN  
GYAGYIDGGASQEEFYKFIKPILEKMDGTEELLVKLNREDLLRKQRTFDNGSIPHQIHLGEL  
HAILRRQEDFYFPLKDNREKIEKILTFRIPIYVVGPLARGNSRFAWMTRKSEETITPWNFEEV  
VDKGASAQSFIERMTNFDKNLPNEKVLPHKSLLEYEFTVYNELTKVKYVTEGMRKPAFLSGE  
QKKAIVDLLFKTNRKVTVKQLKEDYFKKIECFDSVEISGVEDRFNASLGTYHDLKIKDKD  
FLDNEENEDILEDIVLTLTLFEDREMIEERLKYAHLFDDKVMKQLKRRRYTGWGRLSRKL  
NGIRDKQSGKTIIDFLKSDGFANRNFMLIHDDSLTFKEDIQKAQVSGQGDSLHEHIANLAG  
SPAIKKILQTVKVVDELVKVMGRHKPENIVIEARENQTTQKGQKNSRERMKRIEEGKEL  
GSQILKEHPVENTQLQNEKLYLYLQNGRDMYVDQELDINRLSDYDVDHIVPQSFLKDDSID  
NKVLRSDKNRGKSDNVPSEEVVKMKNYWRQLLNAKLITQRKFDNLTKAERGGSELKAG  
FIKRQLVETRQITKHVAQILDSRMNTKYDENDKLIREVKVITLKSCLVSDFRKDFQFYKVR  
INNYHHAHDAYLNAVVGTAIIKKYPKLESEFVYGDYKVDVRKMIKSEQEIGKATAKYFFY  
SNIMNFFKTEITLANGEIRKRPLIETNGETGEIVWDKGRDFATVRKVLSPQVNIKKTEVQ  
TGGFSKESILPKRNSDKLIARKKDWDPKKYGGFDSPTVAYSVLVAKVEKKGSKKLKSVKEL  
LGITIMERSSEFKNPIDFLEAKGYKEVKKDLIKLPKYSLELENGRKRMLASAGELQKNE  
LALPSKYVNFYLYASHYEKLGKSPEDNEQKQLFVEQHKHYLDEIEQISEFSKRVILADANL  
DKVLSAYNKHDKPIREQAENIHLFTLTNLGAPAAFYFDTTIDRKRYTSTKEVLDATLIH  
QSITGLYETRIDLSQLGGDKRPAATKKAQAKKKKTRDSGGSTNLSDIIEKETGKQLVIQES  
IILMLPEEVEEVIGNKPESDILVHTAYDESTDENVMLLTSDAPEYKPWALVIQDSNGENKIKM  
LSGGS PKKKRKV\*

### APOBEC1-nCas9-UGI

(NLS-APOBEC1-XTEN-nCas9-NLS-UGI-NLS)

M P K K K R K V S S E T G P V A V D P T L R R R I E P H E F E V F F D P R E L R K E T C L L Y E I N W G G R H S I W R H T S  
Q N T N K H V E V N F I E K F T T E R Y F C P N T R C S I T W F L S W S P C G E C S R A I T E F L S R Y P H V T L F I Y I A  
R L Y H H A D P R N R Q G L R D L I S S G V T I Q I M T E Q E S G Y C W R N F V N Y S P S N E A H W P R Y P H L W V R L Y V  
L E L Y C I I L G L P P C L N I L R R K Q P Q L T F F T I A L Q S C H Y Q R L P P H I L W A T G L K S G S E T P G T S E S A  
T P E L K D K K Y S I G L A I G T N S V G W A V I T D E Y K V P S S K F K V L G N T D R H S I K K N L I G A L L F D S G E T  
A E A T R L K R T A R R R Y T R R K N R I C Y L Q E I F S N E M A K V D D S F F H R L E E S F L V E E D K K H E R H P I F G  
N I V D E V A Y H E K Y P T I Y H L R K K L V D S T D K A D L R L I Y L A L A H M I K F R G H F L I E G D L N P D N S D V D  
K L F I Q L V Q T Y N Q L F E E N P I N A S G V D A K A I L S A R L S K S R R L E N L I A Q L P G E K K N G L F G N L I A L  
S L G L T P N F K S N F D L A E D A K L Q L S K D T Y D D D L N L L A Q I G D Q Y A D L F L A A K N L S D A I L L S D I L  
R V N T E I T K A P L S A S M I K R Y D E H H Q D L T L L K A L V R Q Q L P E K Y K E I F F D Q S K N G Y A G Y I D G G A S  
Q E E F Y K F I K P I L E K M D G T E E L L V K L N R E D L L R K Q R T F D N G S I P H Q I H L G E L H A I L R R Q E D F Y  
P F L K D N R E K I E K I L T F R I P Y Y V G P L A R G N S R F A W M T R K S E E T I T P W N F E E V V D K G A S A Q S F I  
E R M T N F D K N L P N E K V L P K H S L L Y E Y F T V Y N E L T K V K Y V T E G M R K P A F L S G E Q K K A I V D L L F K





### AID10-dLbCas12a-UGI

(NLS-AID10-XTEN-dLbCas12a-(GGG)<sub>6</sub> linker-UGI-NLS-2×FLAG)

MA**PKKKR**K**VG**I**HG**V**PA**AD**SLLMNR**REFLYQ**FKNVR**WAK**GRRE**TYLCYV**VERRD**CATS**FS**SLDF  
GYLRN**KNGCH**VELL**FLRY**ISDWLD**PGRCYR**VTW**FIS**WSPCYDCARHVAD**FLRGNPN**LSLRI  
FAARLY**FCEDR**KAE**PEGLRRL**RRAGVQ**IAIM**TFKDYFYCWNT**FAENH**GRT**FKAW**EGLHENS**V**  
RL**SGQLRR**IL**SGSE**TP**GTSES**AT**PES**M**SKLE**KFTNCYSLSKTLRFKAI**PVG**KTQENIDNKRL  
LVEDEKRAEDYKGVKLLDRYYLS**FIND**VLHSIKLKNLNNYISLFRKKTRTEKENKELENLE  
INLRKEIAKAFK**NEGYK**SLFKKDI**IETIL**PEFLDDKDEIALVNSFNGFTTAFTGFFDNREN  
MFSE**EAK**ST**SIA**FR**CINEN**LTRYIS**NMDI**FEKVD**AIF**DKHEVQ**EIKE**KILNSDYDVEDFFEG  
EFFNFVLTQEGIDVYNAI**IGGF**V**TES**GEKIKGLNEYINLYNQ**TKQ**KLPKFKPLYKQVLSDR  
ESLSFYGEGY**TSDEE**VLE**VRNT**LNK**NS**E**IF**SS**IKK**LEKLFK**NF**DEYSSAG**IF**VKNGPA**IST**  
ISKDI**FG**EWN**VI**RD**KWNA**EYDDIHL**KKK**AVVTEKYEDDRRKS**FKK**IGSFSLEQLQEYADADL  
SVVEKLKEII**I**Q**V**DEIYK**VY**GSSEKLFDA**DV**LEKSLK**KNDA**VVA**IMK**DL**LD**SVK**S**FENYI  
KAFFGEGKETNRDES**FY**GDFV**LAY**DILLKVDHIYDAIRNYVTQ**KP**YSKDKFKLYFQ**NP**QFMG  
GWDKDKETDYRATILRYGSKYYLA**IM**DKKYAKCLQKIDKDDVNGNYEKIN**YK**LLPGPNKMLP  
KVFFSK**WM**AY**NP**SEDIQKIYK**NG**TFKK**GDM**FN**LN**DCHKLIDFFKDSISRYPKWSNAYDFN  
FSETEKYKDIAGFYREVEEQYKVS**FES**ASKKEVDK**LVEE**GKLYMFQIYNKDFSDKSHGTPN  
LHTMYFKLLFDENN**HGQ**IRLSGGAE**LF**MRRASL**KKEE**LVVHPANSPIANK**NP**DNPKKTTLS  
YDVYKDKR**FS**EDQYELHIPIA**IN**KCPK**NI**FKINTEVRVLLKHDDNPYVIGI**A**RGERNLLYIV  
VVDGKGNIVEQYSLNEI**INN**FNGIRIKTDYHSLLDKKEKERFEARQ**NW**TSIENIKELKAGYI  
SQVVHKICELVEKYDAVIALED**LN**SGFKNSRVKVEKQVYQ**KFE**KMLIDKLN**YM**VDKKS**N**PCA  
TGGAL**KY**QITNK**FES**FKSMSTQNGF**IF**YIPAWLTSKIDPSTGFVN**LL**KTKYTSIADSKKFI  
SSFD**RIM**YVPEEDLFEFALDYK**NF**SRTDADYIKKW**KLY**SYGNRIRIFRNPK**NN**VFDWEEVC  
LTSAYKELFNKYGIN**YQ**QDIRALLCEQSDKAFYSSFMALMSLMLQMRNSITGR**TD**VDFLIS  
PVKNSDGI**FY**DSRNYEAQENAILPK**NAD**ANGAYNIARKV**LWA**IGQFKKAEDEKLDKVKIAIS  
NKEWLEYAQTSVKH**GGGG**SGGGSGGGSGGGSGGGSGGGSGGG**ST**NLS**DI**IEKETG**KQ**L**VI**Q  
ES**IL**MLPEEVEEVIG**NK**PESDILVHTAYDESTDEN**VML**LTS**DA**PEYK**PW**AL**VI**QDSNGENKI  
KMLSGGS**KR**PAAT**KK**AG**QA**KKKKRPPPSDYKDDDDKDYKDDDDK\*

### AID10-nSpCas9-NG-UGI

(NLS-AID10-XTEN-nSpCas9-NG-(GGG)<sub>6</sub> linker-UGI-NLS-2×FLAG)

MA**PKKKR**K**VG**I**HG**V**PA**AD**SLLMNR**REFLYQ**FKNVR**WAK**GRRE**TYLCYV**VERRD**CATS**FS**SLDF  
GYLRN**KNGCH**VELL**FLRY**ISDWLD**PGRCYR**VTW**FIS**WSPCYDCARHVAD**FLRGNPN**LSLRI  
FAARLY**FCEDR**KAE**PEGLRRL**RRAGVQ**IAIM**TFKDYFYCWNT**FAENH**GRT**FKAW**EGLHENS**V**  
RL**SGQLRR**IL**SGSE**TP**GTSES**AT**PES**D**KKY**SIG**LA**IGTNSVGWAVITDEYK**VPS**KKFKVLGN  
TDRHSIKK**NLI**GALLFD**SGET**A**EAT**RLKRTARRRYTRRKNR**IC**YLQ**EI**FSNEMAKVDD**SFF**H  
RLEESFLVEEDKKHERHPI**FG**NI**V**DEVAYHEKYPTIYHLR**KK**LVDSTDKADLRLIYLALAHM  
IKFRGHFLIEGDLNP**DS**DVDKLF**IQ**LVQTY**NQ**LFEENPINASGVDAKAIL**SAR**LSK**S**RRLE  
NLIAQL**PGE**KK**NGL**FGN**LIAL**SLGLTP**NF**KS**NF**DLA**E**DAKLQLSKDTYDDDL**DN**LLAQIGDQ  
YADLFLAAK**NLS**DA**ILL**SDILRVNTEITK**AP**LS**AS**MIKRYDEHHQDLTLLK**AL**VRQQLPEKY  
KEIFFDQSKNGYAGYIDGGASQ**E**EFYK**FI**KPILEKMDGTE**ELL**VKLNREDLLR**KQ**RTFDNGS  
IPHQIHLGELHAILRRQ**ED**FYPFLKDNREKIEKIL**TF**RIPYYVG**PL**ARGNSRF**AW**M**TR**KSEE  
TITPW**NF**E**EV**VDKGAS**AQ**S**FIER**MT**NF**DK**NL**PNEK**VL**PKHSLLYEYFTVYNELTKVKYVTEG



### nCas9-AID10-UGI

(NLS-nCas9-NLS-XTEN-AID10-NLS-UGI-2×FLAG)

MAPKKKRKVGIIHGVPAAADKKYSIGLAIGTNSVGWAVITDEYKVPSSKKFKVLGNTDRHSIKKN  
LIGALLFDSGETAEATRLKRTARRRYTRRKNRICYLQEIFSNEMAKVDDSFHRLEESFLVE  
EDKKHERHPIFGNIVDEVAYHEKYPTIYHLRKKLVDSTDKADLRLIYLALAHMIKFRGHFLI  
EGDLNPDNSDVKLFIQLVQTYNQLFEEENPINASGVDAKAILSARLSKSRLENLIAQLPGE  
KKNGLFGNLIASLGLTPNFKSNFDLAEDAQLQSKDQYDDDLNLLAQIGDQYADLFLAAK  
NLSDAILLSLILRVNTEITKAPLSASMIKRYDEHHQDLTLLKALVRQQLPEKYKEIFFDQSK  
NGYAGYIDGGASQEEFYKFIKPILEKMDGTEELLVKNLREDLLRKQRTFDNGSIPHQIHLGE  
LHAILRRQEDFYFPLKDNREKIEKILTFRIPYYVGPLARGNSRFAMTRKSEETITPWNFEE  
VVDKGASAQSFIERMTNFDKNLPNEKVLPHKSLLEYEFTVYNELTKVKYVTEGMRKPAFLSG  
EQKKAIVDLLFKTNRKVTVKQLKEDYFKKIECFDSVEISGVEDRFNASLGTYHDLKIKDK  
DFLDNEENEDILEDIVLTLTLFEDREMIEERLKYAHLFDDKVMKQLKRRRYTGWGRLSRKL  
INGIRDKQSGKTILDFLKSDFANRNFQMQLIHDDSLTFKEDIQKAQVSGQGDSLHEHIANLA  
GSPAIAKKGILQTVKVVDELVKVMGRHKPENIVIEMARENQTTQKGQKNSRERMKRIEEGIKE  
LGSQILKEHPVENTQLQNEKLYLYLQNGRDMYVDQELDINRLSDYDVDHIVPQSFLKDDSI  
DNKVLTRSDKNRGKSDNVPSEEVVKMKNYWRQLLNAKLITQRKFDNLTKAERGGLSELDA  
GFIKRQLVETRQITKHVAQILDSRMNTKYDENDKLIREVKVITLKSCLVSDFRKDFQFYKVR  
EINNYHHAHDAYLNAVVGTAIIKKYPKLESEFVYGDYKVDVRKMIKSEQEIGKATAKYFF  
YSNIMNFFKTEITLANGEIRKRPLIETNGETGEIVWDKGRDFATVRKVLVSMQVNIIVKKTEV  
QTGGFSKESILPKRNSDKLIARKKDWDPKKGFFSPTVAYSVLVVAKVEKGSKLLKSVKE  
LLGITIMERSSSFENPIDFLEAKGYKEVKKDLIKLPHYSLFELENGRKRMLASAGELQKGN  
ELALPSKYVNFYLYLASHYEKLGKSPEDNEQKQLFVEQHKHYLDEIEQISEFSKRVIADAN  
LDKVL SAYNKHRDKPIREQAENI IHLFTLTNLGAPAAFKYFDTTIDRKRYTSTKEVL DATLI  
HQSITGLYETRIDLSQLGGDKRPAATKKAQAKKKRPSPSGSETPGTSESATPESDLSLLMN  
RREFLYQFKNVRWAKGRRETYLCYVVERRDCATSFSLDFGYLRNKNKGCHVELLFLRYISDWD  
LDPGRCYRVTFWISWSPCYDCARHVADFLRGNPNLSLRIFAARLYFCEDRKAPEGLRRLRR  
AGVQIAIMTFKDYFYCWNTFAENHGRTFKAWEGHENSVRSLGQLRRILGPKKKRKGSTNL  
SDIEKETGKQLVIQESILMLPEEVEEVI GNKPESDILVHTAYDESTDENVMLLTSDAPEYK  
PWALVIQDSNGENKIKMLRPPPSDYKDDDDKDYKDDDDK\*

### AID10-nCas9-AID10-UGI

(NLS-AID10-XTEN-nCas9-NLS-XTEN-AID10-NLS-UGI-2×FLAG)

MAPKKKRKVGIIHGVPAAADSLLMNRREFLYQFKNVRWAKGRRETYLCYVVERRDCATSFSLDF  
GYLRNKNKGCHVELLFLRYISDWDLDPGRCYRVTFWISWSPCYDCARHVADFLRGNPNLSLRI  
FAARLYFCEDRKAPEGLRRLRRAGVQIAIMTFKDYFYCWNTFAENHGRTFKAWEGHENS  
RLSGQLRRILSGSETPGTSESATPESDKKYSIGLAIGTNSVGWAVITDEYKVPSSKKFKVLGN  
TDRHSIKKNLIGALLFDSGETAEATRLKRTARRRYTRRKNRICYLQEIFSNEMAKVDDSFH  
RLEESFLVEEDKKHERHPIFGNIVDEVAYHEKYPTIYHLRKKLVDSTDKADLRLIYLALAHM  
IKFRGHFLIEGDLNPDNSDVKLFIQLVQTYNQLFEEENPINASGVDAKAILSARLSKSRLE  
NLIAQLPGEKKNGLFGNLIASLGLTPNFKSNFDLAEDAQLQSKDQYDDDLNLLAQIGDQ  
YADLFLAAKNLSDAILLSLILRVNTEITKAPLSASMIKRYDEHHQDLTLLKALVRQQLPEKY  
KEIFFDQSKNGYAGYIDGGASQEEFYKFIKPILEKMDGTEELLVKNLREDLLRKQRTFDNGS

IPHQIHLGELHAILRRQEDFYPFLLKDNREKIEKILTFRIPIYYVGPLARGNSRFAMWTRKSEE  
TITPWNFEEVVDKGASAQSFIERMTNFDKNLPNEKVLPHKSLLEYEYFTVYNELTKVKYVTEG  
MRKPAFLSGEQKKAIVDLLFKTNRKVTVKQLKEDYFKKIECFDSVEISGVEDRFNASLGTYH  
DLLKIIKDKDFLDNEENEDILEDIVLTLTLFEDREMIEERLKYAHLFDDKVMKQLKRRRYT  
GWGRLSRKLINGIRDKQSGKTILDFLKSDFANRNFQMQLIHDDSLTFKEDIQKAQVSGQGDS  
LHEHIANLAGSPAIAKKGILQTVKVVDELVKVMGRHKPENIVIAMARENQTTQKGQKNSRERM  
KRIIEGKELGSQILKEHPVENTQLQNEKLYLYLQNGRDMYVDQELDINRLSDYDVDHIVP  
QSFLKDDSIDNKVLRSDKNRGSNDNVPSEEVVKKMKNYWRQLLNAKLITQRKFDNLTKAER  
GGLSELKAGFIKRQLVETRQITKHVAQILDSRMNTKYDENDKLIREVKVITLKSCLVSDFR  
KDFQFYKVREINNYHHAHDAYLNAVVGTAIIKKYPKLESEFVYGDYKVYDVRKMIKSEQEI  
GKATAKYFFYSNIMNFFKTEITLANGEIRKRPLIETNGETGEIVWDKGRDFATVRKVLSPQ  
VNIVKKTEVQTGGFSKESILPKRNSDKLIARKKDWDPKKGFFDSPTVAYSVLVAKVEKKG  
SKKLSVKELLGITIMERSSEFEKNPIDFLEAKGYKEVKKDLIIKLPKYSLFELENGRKRMLA  
SAGELQKGNELALPSKYVNFLYLASHYEKLGKSPEDNEQKQLFVEQHKHYLDEIIEQISEFS  
KRVILADANLNDKVL SAYNKHRDKPIREQAENIIHLFTLTNLGAPAAFKYFDTTIDRKRYTST  
KEVLDTLIHQSI TGLYETRIDLSQLGGDKRPAATKKAGQAKKKRPSPSGSETPGTSESAT  
PESDLSLLMNRREFLYQFKNVRWAKGRRETYLCYVVERRDCATSFSLDFGYLRNKNNGCHVELL  
FLRYSIDWDLDPGRCYRVTWFISWSPCYDCARHVADFLRGPNLSLRIFAARLYFCEDRKAE  
PEGLRRLRRAGVQIAIMTFKDYFYCWNTFAENHGRTFKAWEGHENSVRLSGQLRRILGPKK  
KRKVGSTNLSDIIEKETGKQLVIQESILMLPEEVVEEVIIGNKPESDILVHTAYDESTDENVML  
LTSDAPEYKPWALVIQDSNGENKIKMLRPPPSDYKDDDDKDYKDDDDK\*

### ABE7.10-nCas9

(TadA-32aa linker-TadA7.10-32aa linker-nCas9-NLS-NLS-2×FLAG)

MGSEVEFSHEYWMRHALTLAKRAWDEREVPVAVLVHNNRVIGEGWNRPIGRHDPTAHAEIM  
ALRQGGGLVMQNYRLIDATLYVTLEPCVMCAGAMIHSRIGRVVFGARDAKTGAAGSLMDVLHH  
PGMNRHVEITEGILADECAALLSDFFRMRQEIKAQKKAQSSTDSGGSSGGSSGSETPGTSE  
SATPESSGGSSGGSSSEVEFSHEYWMRHALTLAKRARDEREVPVAVLVHNNRVIGEGWNRPI  
GLHDPTAHAEIMALRQGGGLVMQNYRLIDATLYVTLEPCVMCAGAMIHSRIGRVVFGVRNAKT  
GAAGSLMDVLHYPGMNRHVEITEGILADECAALLCYFFRMRQVFNAQKKAQSSTDSGGSSG  
GSSGSETPGTSESATPESSGGSSGGSSDKKYSIGLAIGTNSVGWAVITDEYKVPKSKFKVLGN  
TDRHSIKKNLIGALLFDSGETAEATRLKRTARRRYTRRKNRICYLQEIFSNEMAKVDDSFH  
RLEESFLVEEDKKHERHPIFGNIVDEVAYHEKYPTIYHLRKKLVDSTDKADRLIYLALAHM  
IKFRGHFLIEGDLNPDNSDVKLFIQLVQTYNQLFEENPINASGVDAKAILSARLSKSRLE  
NLIAQLPGEKKNGLFGNLIASLGLTPNFKSNFDLAEDAKLQLSKDXYDDDLNLLAQIGDQ  
YADLFLAAKNLSDAILLSDILRVNTEITKAPLSASMIKRYDEHHQDLTLLKALVRQQLPEKY  
KEIFFDQSKNGYAGYIDGGASQEEFYKFIKPILEKMDGTEELLVKLNREDLLRQRTFDNGS  
IPHQIHLGELHAILRRQEDFYPFLLKDNREKIEKILTFRIPIYYVGPLARGNSRFAMWTRKSEE  
TITPWNFEEVVDKGASAQSFIERMTNFDKNLPNEKVLPHKSLLEYEYFTVYNELTKVKYVTEG  
MRKPAFLSGEQKKAIVDLLFKTNRKVTVKQLKEDYFKKIECFDSVEISGVEDRFNASLGTYH  
DLLKIIKDKDFLDNEENEDILEDIVLTLTLFEDREMIEERLKYAHLFDDKVMKQLKRRRYT  
GWGRLSRKLINGIRDKQSGKTILDFLKSDFANRNFQMQLIHDDSLTFKEDIQKAQVSGQGDS  
LHEHIANLAGSPAIAKKGILQTVKVVDELVKVMGRHKPENIVIAMARENQTTQKGQKNSRERM

KRIEEGIKELGSQILKEHPVENTQLQNEKLYLYYLQNGRDMYVDQELDINRLSDYDVDHIVP  
QSFLKDDSIDNKVLTRSDKNRGKSDNVPSEEVVKKMKNYWRQLLNAKLITQRKFDNLTKAER  
GGLSELDKAGFIKRQLVETRQITKHVAQILDSRMNTKYDENDKLIREVKVITLKSCLVSDFR  
KDFQFYKVR EINNYYHHAHDAYLNAVVG TALIKKYPKLESEFVYGDYKVYDVRKMIAKSEQEI  
GKATAKYFFYSNIMNFFKTEITLANGEIRKRPLIETNGETGEIVWDKGRDFATVRKVL SMPQ  
VNIVKKTEVQTGGFSKESILPKRNSDKLIARKKDWDPKKYGGFDSPTVAYSVLVVAKVEK GK  
SKKLKSVKELLGITIMERSSSFENPIDFLEAKGYKEVKKDLI IKLPKYSLFELENGRKRMLA  
SAGELQKGNELALPSKYVNFLYLASHYEKLGSPEDNEQKQLFVEQHKHYLDEIIEQISEFS  
KRVILADANLDKVL SAYNKHRDKPIREQAENI IHLFTLTNLGAPAAFKYFDTTIDRKRYTST  
KEVL DATLIHQSI TGLYETRIDLSQLGGKRPAAATKKAGQAKKKKSGGS PKKKRKVRPPPSD  
YKDDDDKDYKDDDDK\*

### nCas9-AID10

(NLS-nCas9-NLS-XTEN-AID10-2xFLAG)

MAPKKKRKVG I HGVPAADKKYSIGLAIGTNSVGVAVITDEYKVP SKKFKVLGNTDRHS IKKN  
LIGALLFDSGETAEATRLKRTARRRYTRRKNRICYLQEIFSNEMAKVDDSDFFHRLEESFLVE  
EDKKHERHPIFGNIVDEVAYHEKYPTIYHLRKKLV DSTDKADLRLIYLALAHMIKFRGFHFLI  
EGDLNPDNSDVKLFIQLVQTYNQLFEENPINASGVDAKAILSARLSKSRLENLIAQLPGE  
KKNGLFGNLI ALSLGLTPNFKSNFDLAEDAQLSKD TYDDDLNLLAQIGDQYADFLFAAK  
NLSDAILLSDILRVNTEITKAPLSAMIKRYDEHHQDLTLLKALVRQQLPEKYKEIFFDQSK  
NGYAGYIDGGASQEEFYKFIKPILEKMDGTEELLVKNREDLLRKQRTFDNGSIPHQIHLGE  
LHAILRRQEDFY PFLKDNREKIEKILTFRI PYYVGPLARGNSRFAMWTRKSEETITPWNFEE  
VVDKGASAQSFIERMTNFDKNLPNEKVL PKHSLLEYFTVYNELTKVKYVTEGMRKPAFLSG  
EQKKAIVDLLFKTNRKVTVKQLKEDYFKKIECFDSVEISGVEDRFNASLGTYHDLLKI IKDK  
DFLDNEENEDI LEDIVLTLTLFEDREMIEERLKYAHLFDDKVMKQLKRRRYTGWGRLSRKL  
INGIRDKQSGKTILDFLKSDFANRNFMQLIHDDSLTFKEDIQKAQVSGQGD SLHEHIANLA  
GSPAIAKKGILQTVKVVDELVKVMGRHKPENIVIEMARENQTTQKGQKNSRERMKRIEEGIKE  
LGSQILKEHPVENTQLQNEKLYLYYLQNGRDMYVDQELDINRLSDYDVDHIVPQSFLKDDSI  
DNKVLTRSDKNRGKSDNVPSEEVVKKMKNYWRQLLNAKLITQRKFDNLTKAERGGLSELDKA  
GFIKRQLVETRQITKHVAQILDSRMNTKYDENDKLIREVKVITLKSCLVSDFRKDFQFYKVR  
EINNYYHHAHDAYLNAVVG TALIKKYPKLESEFVYGDYKVYDVRKMIAKSEQEI GKATAKYFF  
YSNIMNFFKTEITLANGEIRKRPLIETNGETGEIVWDKGRDFATVRKVL SMPQVNIVKKTEV  
QTGGFSKESILPKRNSDKLIARKKDWDPKKYGGFDSPTVAYSVLVVAKVEK GKSKKLKSVKE  
LLGITIMERSSSFENPIDFLEAKGYKEVKKDLI IKLPKYSLFELENGRKRMLASAGELQKGN  
ELALPSKYVNFLYLASHYEKLGSPEDNEQKQLFVEQHKHYLDEIIEQISEFSKRVILADAN  
LDKVL SAYNKHRDKPIREQAENI IHLFTLTNLGAPAAFKYFDTTIDRKRYTSTKEVL DATLI  
HQSI TGLYETRIDLSQLGGKRPAAATKKAGQAKKKKRP SGSETPGTSSESATPESDSL MNRR  
EFLYQFKNVRWAKGRRETYLCYVVERRDCATSFSLDFGYLRNKGCHVELLFLRYISDWDL D  
PGRCYRVTWFI SWSPCYDCARHVADFLRGPNLSLRI FAARLYFCEDRKAPEGLRRLRRAG  
VQIAIMTFKDYFYCWNTFAENHGRTFKAWEGLHENSVRLSGQLRRILRPPPSDYKDDDDKDY  
KDDDDK\*

### ABE7.10-nCas9-AID10

(TadA-32aa linker-TadA7.10-32aa linker-nCas9-NLS-NLS-XTEN-AID10-2×FLAG)

MGSEVEFSHEYWMRHALTLAKRAWDEREVPVGAVLVHNNRVIGEGWNRPIGRHDPTAHAEIM  
ALRQGGLVMQNYRLIDATLYVTLEPCVMCAGAMIHSRIGRVVFGARDAKTGAAGSLMDVLHH  
PGMNRHVEITEGILADECAALLSDFFRMRQEIKAQKKAQSSTDSGGSSGGSSGSETPGTSE  
SATPESSGGSSGGSSSEVEFSHEYWMRHALTLAKRARDEREVPVGAVLVLNNRVIGEGWNR  
GLHDPTAHAEIMALRQGGLVMQNYRLIDATLYVTFEPCVMCAGAMIHSRIGRVVFGVRNAKT  
GAAGSLMDVLHYPGMNRHVEITEGILADECAALLCYFFRMPRQVFNAQKKAQSSTDSGGSSG  
GSSGSETPGTSESATPESSGGSSGGSSDKKYSIGLAIGTNSVGWAVITDEYKVPSSKFKVLGN  
TDRHSIKKNLIGALLFDSGETAEATRLKRTARRRYTRRKNRICYLQEIFSNEMAKVDDSSFFH  
RLEESFLVEEDKKHERHPIFGNIVDEVAYHEKYPTIYHLRKKLVDSTDKADLRLIYLALAHM  
IKFRGHFLIEGDLNPDNSDVKLFIQLVQTYNQLFEENPINASGVDAKAIL SARLSKSRLE  
NLIAQLPGEKKNGLFGNLIALSGLTPNFKSNFDLAEDAQLQSKDQYDDDLNLLAQIGDQ  
YADLFLAAKNLSDAILLSDILRVNTEITKAPLSASMIKRYDEHHQDLTLLKALVRQQLPEKY  
KEIFFDQSKNGYAGYIDGGASQEEFYKFIKPILEKMDGTEELLVKNLREDLLRQRTFDNGS  
IPHQIHLGELHAILRRQEDFYPFKDNREKIEKILTFRIPIYYVGPLARGNSRFAMWTRKSEE  
TITPWNFEVVVDKGASAQSFIERMTNFDKNLPNEKVLPKHSLLEYFTVYNELTKVKYVTEG  
MRKPAFLSGEQKKAIVDLLFKTNRKVTVKQLKEDYFKKIECFDSVEISGVEDRFNASLGT  
DYLKIIKDKDFLDNEENEDILEDIVLTLTLFEDREMIEERLKYAHLFDDKVMKQLKRRRYT  
GWGRLSRKLINGIRDKQSGKTILDFLKSDFANRNFMLIHDSDLTFKEDIQKAQVSGQGDS  
LHEHIANLAGSPAIKKGIHQTVKVVDELVKVMGRHKPENIVIAMARENQTTQKQKNSRERM  
KRIIEGKELGSQILKEHPVENTQLQNEKLYLYLQNGRDMYVDQELDINRLSDYDVDHIVP  
QSFLKDDSIDNKVLRSDKNRGSNDNVPSEEVVKKMKNYWRQLLNAKLITQRKFDNLTKAER  
GGLSELKAGFIKRQLVETRQITKHVAQILDSRMNTKYDENDKLIREVKVITLKSCLVSDFR  
KDFQFYKVVREINNYHHAHDAYLNAVVGTAIIKKYPKLESEFVYGDYKVYDVRKMIAKSEQEI  
GKATAKYFFYSNIMNFFKTEITLANGEIRKRPLIETNGETGEIVWDKGRDFATVRKVL SMPQ  
VNIVKKTEVQTGGFSKESILPKRNSDKLIARKKDWDPKKYGGFDSPTVAYSVLVAKVEK GK  
SKKLSVKELLGITIMERSSEFEKNPIDFLEAKGYKEVKKDLIIKLPKYSLELENGRKRMLA  
SAGELQKGNELALPSKYVNFLYLASHYEKLGKSPEDNEQKQLFVEQHKHYLDEIIEQISEFS  
KRVILADANLNDKVL SAYNKHRDKPIREQAENIHLFTLTNLGAPAAFKYFDTTIDRKRYTST  
KEVL DATLIHQSI TGLYETRIDLSQLGGDKRPAATKKAGQAKKKKSGGSPKKKRKVRPSGSE  
TPGTSESATPESD SLLMNRREFLYQFKNVRWAKGRRETYLCYVVERRDCATSFSLDFGYLRN  
KNGCHVELLFLRYISDWDLDPGRCYRVTWFI SWSPCYDCARHVADFLRGNPNLSLRIFAARL  
YFCEDRKAPEGLRRLRRAGVQIAIMTFKDYFYCWNTFAENHGRTFKAWEGHENSVRLSGQ  
LRRILRPPPSDYKDDDDKDYKDDDDK\*

### TadA7.10-nCas9-AID10

(TadA7.10-32aa linker-nCas9-NLS-NLS-XTEN-AID10-2×FLAG)

MGSEVEFSHEYWMRHALTLAKRARDEREVPVGAVLVLNNRVIGEGWNRPIGRHDPTAHAEIM  
ALRQGGLVMQNYRLIDATLYVTFEPCVMCAGAMIHSRIGRVVFGVRNAKTGAAGSLMDVLH  
PGMNRHVEITEGILADECAALLCYFFRMPRQVFNAQKKAQSSTDSGGSSGGSSGSETPGTSE  
SATPESSGGSSGGSSDKKYSIGLAIGTNSVGWAVITDEYKVPSSKFKVLGN TDRHSIKKNLIG  
ALLFDSGETAEATRLKRTARRRYTRRKNRICYLQEIFSNEMAKVDDSSFFHRLEESFLVEEDK





RQQLPEKYKEIFFDQSKNGYAGYIDGGASQEEFYKFIKPILEKMDGTEELLVKLNRDILLRK  
QRTFDNGSIPHQIHLGELHAILRRQEDFYPPFLKDNREKIEKILTFRIPIYYVGPLARGNSRFA  
WMTRKSEETITPWNFEVVDK GASAQSFIERMTNFDKNLPNEKVLPKHSLLEYFTVYNELT  
KVKYVTEGMRKPAFLSGEQKKAIVDLLFKTNRKVTVKQLKEDYFKKIECFDSVEISGVEDRF  
NASLGTYHDLLKIIKDKDFLDNEENEDILEDIVLTLTLFEDREMIEERLKTYAHLFDDKVMK  
QLKRRRYTGWGRLSRKLINGIRDKQSGKTILDFLKSDFANRNFQMQLIHDDSLTFKEDIQKA  
QVSGQGDSLHEHIANLAGSPAIIKKGILQTVKVVDELVKVMGRHKPENIVIEMARENQTTQKG  
QKNSRERMKRIEEGIKELGSQILKEHPVENTQLQNEKLYLYYLQNGRDMYVDQELDINRLSD  
YDVDHIVPQSFLKDDSIDNKVLTRSDKNRGKSDNVPSEEVVKKMKNYWRQLLNAKLITQRKF  
DNLTKAERGGLSELKAGFIKRQLVETRQITKHVAQILDSRMNTKYDENDKLIREVKVITLK  
SKLVSDFRKDFQFYKREINNYHHAHDAYLNAVGTALIKKYPKLESEFVYGDYKVYDVRKM  
IAKSEQEIGKATAKYFFYSNIMNFFKTEITLANGEIRKRPLIETNGETGEIVWDKGRDFATV  
RKVLSMPQVNIVKKTEVQTGGFSKESILPKRNSDKLIARKKDWDPKKYGGFDSPTVAYSVLV  
VAKVEKGSKKLKSVKELLGITIMERSSEFEKNPIDFLEAKGYKEVKKDLIIKLPKYSLEFE  
NGRKRMLASAGELQKGNELALPSKYVNFYLYLASHYEKLGSPEDNEQKQLFVEQHKHYLDEI  
IEQISEFSKRVI LADANLDKVL SAYNKHRDKPIREQAENI IHLFTLTNLGAPAAFKYFDTTI  
DRKRYTSTKEVL DATLIHQSI TGLYETRIDLSQLGGDKRPAATKKAGQAKKKKSGGS PPKKR  
KVRPPPSDYKDDDDKDYKDDDDK\*

### AID10-TadA7.10-nCas9

(AID10-XTEN-TadA7.10-32aa linker-nCas9-NLS-NLS-2×FLAG)

MDSLLMNRREFLYQFKNVRWAKGRRETYLCYVVERRDCATSFSLDFGYLRNKNKGCHVELLFL  
RYISDWDLDPGRCYRVTWFI SWSPCYDCARHVADFLRGNPNLSLRI FAARLYFCEDRKAPEE  
GLRRLRRAGVQIAIMTFKDYFYCWNTFAENHGRTFKAWEGLHENSVRLSGQLRRILSGSETP  
GTSESATPESSEVEFSHEYWMRHALLAKRARDEREVPPGAVLVLNRRVIGEGWNRAIGLHD  
PTAHAEIMALRQGGGLVMQNYRLIDATLYVTFEPCVMCAGAMIHSRIGRVVFGVRNAKTGAAG  
SLMDVLHYPGMNRVEITEGILADECAALLCYFFRMPRQVFNAQKKAQSSTDSGGSSGGSSG  
SETPGTSESATPESGGSSGGSDKKYSIGLAIGTNSVGWAVITDEYKVPSKKFKVLGNTDRH  
SIKKNLIGALLFDSGETAEATRLKRTARRRYTRRKNRICYLQEIFSNEMAKVDDSSFHRL  
SFLVEEDKKHERHPIFGNIVDEVAYHEKYPTIYHLRKKLVDSTDKADLRLIYLALAHMIKFR  
GHFLIEGDLNPDNSDVKLFIQLVQTYNQLFEENPINASGVDAKAILSARLSKSRLENLIA  
QLPGEKKNGLFGNLIASLGLTPNFKSNFDLAEDAKLQLSKD TYDDDLNLLAQIGDQYADL  
FLAAKNLSDAILLSDILRVNTEITKAPLSASMIKRYDEHHQDLTLLKALVRQQLPEKYKEIF  
FDQSKNGYAGYIDGGASQEEFYKFIKPILEKMDGTEELLVKLNRDILLRKQRTFDNGSIPHQ  
IHLGELHAILRRQEDFYPPFLKDNREKIEKILTFRIPIYYVGPLARGNSRFAWMTRKSEETITP  
WNFEVVDK GASAQSFIERMTNFDKNLPNEKVLPKHSLLEYFTVYNELTKVKYVTEGMRKPA  
AFLSGEQKKAIVDLLFKTNRKVTVKQLKEDYFKKIECFDSVEISGVEDRFNASLGTYHDLLK  
IIKDKDFLDNEENEDILEDIVLTLTLFEDREMIEERLKTYAHLFDDKVMKQLKRRRYTGWGR  
LSRKLINGIRDKQSGKTILDFLKSDFANRNFQMQLIHDDSLTFKEDIQKAQVSGQGDSLHEH  
IANLAGSPAIIKKGILQTVKVVDELVKVMGRHKPENIVIEMARENQTTQKGQKNSRERMKRIE  
EGIKELGSQILKEHPVENTQLQNEKLYLYYLQNGRDMYVDQELDINRLSDYDVDHIVPQSFL  
KDDSIDNKVLTRSDKNRGKSDNVPSEEVVKKMKNYWRQLLNAKLITQRKFDNLTKAERGGLS  
ELDKAGFIKRQLVETRQITKHVAQILDSRMNTKYDENDKLIREVKVITLKSKLVSDFRKDFQ



FYKVVREINNYHHAHDAYLNAVVGTTALIKKYPKLESEFVYGDYKVYDVRKMIKSEQEIGKAT  
AKYFFYSNIMNFFKTEITLANGEIRKRPLIETNGETGEIVWDKGRDFATVRKVLSPQVNI  
KKTEVQTTGGFSKESILPKRNSDKLIARKKDWDPKKYGGFDSPTVAYSVLVAKVEKSKKL  
KSVKELLGITIMERSSEFEKNPIDFLEAKGYKEVKKDLIIKLPKYSLEFELNGRKRMLASAGE  
LQKGNELALPSKYVNFLYLASHYEKLGSPEDNEQKQLFVEQHKHYLDEIIIEQISEFSKRVI  
LADANLDKVL SAYNKHRDKPIREQAENIIHLFTLTNLGAPAAFKYFDTTIDRKRYTSTKEVL  
DATLIHQSI TGLYETRIDLSQLGGDKRPAATKKAGQAKKKKSGGSPKKKRKVRPPPSDYKDD  
DDKDYKDDDDK\*

### ABE7.10-nCas9-AID10-UGI

(TadA-32aa linker-TadA7.10-32aa linker-nCas9-NLS-NLS-XTEN-AID10-(GGG)<sub>6</sub> linker-UGI-2×FLAG)

MGSEVEFSHEYWMRHALTLAKRAWDEREVPVAVLVHNNRVIGEGWNRPIGRHDPTAHAEIM  
ALRQGGGLVMQNYRLIDATLYVTLEPCVMCAGAMIHSRIGRVVFGARDAKTGAAGSLMDVLHH  
PGMNHRVEITEGILADECAALLSDFFRMRQEIKAQKKAQSSTDSGGSSGGSSGSETPGTSE  
SATPESSGGSSGGSSSEVEFSHEYWMRHALTLAKRARDEREVPVAVLVHNNRVIGEGWNRPI  
GLHDPTAHAEIMALRQGGGLVMQNYRLIDATLYVTLEPCVMCAGAMIHSRIGRVVFGVRNAKT  
GAAGSLMDVLHYPGMNHRVEITEGILADECAALLCYFFRMPRQVFNAQKKAQSSTDSGGSSG  
GSSGSETPGTSESATPESSGGSSGGSSDKKYSIGLAIGTNSVGWAVITDEYKVPKSKFKVLGN  
TDRHSIKKNLIGALLFDSGETAEATRLKRTARRRYTRRKNRICYLQEIFSNEMAKVDDSFH  
RLEESFLVEEDKKHERHPIFGNIVDEVAYHEKYPTIYHLRKKLVDSTDKADRLIYLALAHM  
IKFRGHFLIEGDLNPDNSDVKLFIQLVQTYNQLFEENPINASGVDAKAILSARLSKSRRL  
NLIAQLPGEKKNGLFGNLIALLSGLTPNFKSNFDLAEDAKLQLSKDQYDDDLNLLAQIGDQ  
YADFLAANKLSDAILLSDILRVNTEITKAPLSASMIKRYDEHHQDLTLLKALVRQQLPEKY  
KEIFFDQSKNGYAGYIDGGASQEEFYKFIKPILEKMDGTEELLVKNLREDLLRKQRTFDNGS  
IPHQIHLGELHAILRRQEDFYFPLKDNREKIEKILTFRIPYVVGPLARGNSRFAMWTRKSEE  
TITPWNFEVVDKASQAQSFIERMTNFDKNLPNEKVLPKHSLLEYFTVYNELTKVKYVTEG  
MRKPAFLSGEQKKAIVDLLFKTNRKVTVKQLKEDYFKKIECFDSVEISGVEDRFNASLGT  
YHDLKIIKDKDFLDNEENEDILEDIVLTLTLFEDREMIEERLKYAHLFDDKVMKQLKRRRYT  
GWGRLSRKLINGIRDKQSGKTILDFLKSDFANRNFMLIHDDSLTFKEDIQKAQVSGQGDS  
LHEHIANLAGSPAIKKGIQTVKVVDELVKVMGRHKPENIVIEMARENQTTQKQKNSRERM  
KRIEELGKELGSQILKEHPVENTQLQNEKLYLYLQNGRDMYVDQELDINRLSDYDVDHIVP  
QSFLKDDSIDNKVLRSDKNRGSNDNVPSEEVVKKMKNYWRQLLNAKLITQRKFDNLTKAER  
GGLSELKAGFIKRQLVETRQITKHVAQILDSRMNTKYDENDKLIREVKVITLKSCLVSDFR  
KDFQFYKVVREINNYHHAHDAYLNAVVGTTALIKKYPKLESEFVYGDYKVYDVRKMIKSEQE  
IGKATAKYFFYSNIMNFFKTEITLANGEIRKRPLIETNGETGEIVWDKGRDFATVRKVLSPQ  
VNIKKTEVQTTGGFSKESILPKRNSDKLIARKKDWDPKKYGGFDSPTVAYSVLVAKVEKSK  
SKLKSVKELLGITIMERSSEFEKNPIDFLEAKGYKEVKKDLIIKLPKYSLEFELNGRKRMLA  
SAGELQKGNELALPSKYVNFLYLASHYEKLGSPEDNEQKQLFVEQHKHYLDEIIIEQISEFS  
KRVI LADANLDKVL SAYNKHRDKPIREQAENIIHLFTLTNLGAPAAFKYFDTTIDRKRYTST  
KEVL DATLIHQSI TGLYETRIDLSQLGGDKRPAATKKAGQAKKKKSGGSPKKKRKVRPSGSE  
TPGTSESATPESDSLLMNRREFLYQFKNVRWAKGRRETYLCYVVERRDCATSFSLDFGYLRN  
KNGCHVELLFLRYSIDWDLDPGRCYRVTFWISWSPCYDCARHVADFLRGNPNLSLRIFAARL

YFCEDRKAPEPEGLRRLRRAGVQIAIMTFKDYFYCWNTFAENHGRTFKAWEGLHENSVRLSGQ  
LRRILGGGGSGGGSGGGSGGGSGGGSGGGSGGGSTNLSDIIEKETGKQLVIQESILMLPEE  
VEEVIGNKPESDILVHTAYDESTDENVMLLTSDAPEYKPWALVIQDSNGENKIKMLS GGSRP  
PPSDYKDDDDKDYKDDDDK\*

### ABE8e-nCas9-AID10-UGI

(TadA-32aa linker-TadA8e-32aa linker-nCas9-NLS-NLS-XTEN-AID10-(GGG)<sub>6</sub> linker  
-UGI-2×FLAG)

MGSEVEFSHEYWMRHALTLAKRAWDEREVPVGAVLVHNNRVI GEGWNRPIGRHDPTAHAEIM  
ALRQGLVMQNYRLIDATLYVTLEPCVMCAGAMIHSRIGRVVFGARDAKTGAAGSLMDVLHH  
PGMNRHVEITEGILADECAALLSDFFRMRQEIKAQKKAQSSTDSGGSSGGSSGSETPGTSE  
SATPESSGGSSGGSSSEVEFSHEYWMRHALTLAKRARDEREVPVGAVLVLNRRVIGEGWNRAI  
GLHDPTAHAEIMALRQGLVMQNYRLIDATLYVTLEPCVMCAGAMIHSRIGRVVFGVRNSKR  
GAAGSLMNVLNYPGMNRHVEITEGILADECAALLCDFYRMPRQVFNAQKKAQSSINSGGSSG  
GSSGSETPGTSESATPESSGGSSGGSSDKKYSIGLAIGTNSVGWAVITDEYKVPSSKFKVLGN  
TDRHSIKKNLIGALLFDSGETAEATRLKRTARRRYTRRKNRICYLQEIFSNEMAKVDDSFH  
RLEESFLVEEDKKHERHPIFGNIVDEVAYHEKYPTIYHLRKKLVDSTDKADLRLIYLALAHM  
IKFRGHFLIEGDLNPDNSDVKLFIQLVQTYNQLFEENPINASGVDAKAIL SARLSKSRLE  
NLIAQLPGEKKNLFGNLIALLSLGLTPNFKSNFDLAEDAQLQSKD TYDDDLNLLAQIGDQ  
YADFLAAKNLSDAILLSDILRVNTEITKAPLSAMIKRYDEHHQDLTLLKALVRQQLPEKY  
KEIFFDQSKNGYAGYIDGGASQEEFYKFIKPILEKMDGTEELLVKNREDLLRQRTFDNGS  
IPHQIHLGELHAILRRQEDFYFPLKDNREKIEKILTFRIPIYYVGPLARGNSRFAMWTRKSEE  
TITPWNFEEVVDKGASAQSFIERMTNFDKNLPNEKVLPKHSLLEYFTVYNELTKVKYVTEG  
MRKPAFLSGEQKKAIVDLLFKTNRKVTVKQLKEDYFKKIECFDSVEISGVEDRFNASLGTYH  
DLLKIIKDKDFLDNEENEDILEDIVLTLTLFEDREMIEERLKYAHLFDDKVMKQLKRRRYT  
GWGRLSRKLINGIRDKQSGKTILDFLKSDFANRNFMQLIHDDSLTFKEDIQKAQVSGQGDS  
LHEHIANLAGSPAIKKGI LQTVKVDELVKVMGRHKPENIVIEMARENQTTQKGQKNSRERM  
KRIEEGIKELGSQILKEHPVENTQLQNEKLYLYLQNGRDMYVDQELDINRLSDYDVDHIVP  
QSFLKDDSIDNKVLRSDKNRGSNDNVPSEEVVKMKNYWRQLLNAKLITQRKFDNLTKAER  
GGLSELDKAGFIKRQLVETRQITKHVAQILDSRMNTKYDENDKLIREVKVITLKSCLVSDFR  
KDFQFYKVREINNYHHAHDAYLNAVVG TALIKKYPKLESEFVYGDYKVYDVRKMIKSEQEI  
GKATAKYFFYSNIMNFFKTEITLANGEIRKRPLIETNGETGEIVWDKGRDFATVRKVL SMPQ  
VNIVKKTEVQTGGFSKESILPKRNSDKLIARKKDWDPKKYGGFDSPTVAYSVLVVAKVEK GK  
SKKLSVKELLGITIMERSSEFEKNPIDFLEAKGYKEVKKDLIIKLPKYSLFELENGRKRMLA  
SAGELQKGNELALPSKYVNFLYLASHYEKLGSPEDNEQKQLFVEQHKHYLDEIIIEQISEFS  
KRVI LADANLDKVL SAYNKHRDKPIREQAENI IHLFTLTNLGAPAAFKYFDTTIDRKRYTST  
KEVL DATLIHQSI TGLYETRIDLSQLGGKRPAAATKKAGQAKKKKSGGSPKKKRKVRPSGSE  
TPGTSESATPESD SLLMNRREFLYQFKNVRWAKGRRETYLCYVVERRDCATSFSLDFGYLRN  
KNGCHVELLFLRYISDWLDPGRCYRVTWFISWSPCYDCARHVADFLRGNPNLSLRIFAARL  
YFCEDRKAPEPEGLRRLRRAGVQIAIMTFKDYFYCWNTFAENHGRTFKAWEGLHENSVRLSGQ  
LRRILGGGGSGGGSGGGSGGGSGGGSGGGSGGGSTNLSDIIEKETGKQLVIQESILMLPEE  
VEEVIGNKPESDILVHTAYDESTDENVMLLTSDAPEYKPWALVIQDSNGENKIKMLS GGSRP  
PPSDYKDDDDKDYKDDDDK\*

### AID10-ABE7.10-nCas9-UGI

(AID10-XTEN-TadA-32aa linker-TadA7.10-32aa linker-nCas9-(GGS)<sub>6</sub> linker-UGI-NLS-NLS-2×FLAG)

MDSLLMNRREFLYQFKNVRWAKGRRETYLCYVVERRDCATSFSLDFGYLRNKNKGCHVELLFL  
RYISDWDLDPGRCYRVTWFISWSPCYDCARHVADFLRGNPNLSLRIFAARLYFCEDRKAEP  
GLRRLRRAGVQIAIMTFKDYFYCWNTFAENHGRTFKAWEGHENSVRSLSGQLRRILSGSETP  
GTSESATPESSEVEFSHEYWMRHALTLAKRAWDEREVPVGAVLVHNNRVIGEGWNRPIGRHD  
PTAHAEIMALRQGGGLVMQNYRLIDATLYVTLEPCVMCAGAMIHSRIGRVVFGARDAKTGAAG  
SLMDVLHHPGMNHRVEITEGILADECAALLSDFFRMRQEIKAQKKAQSSSTDSGGSSGGSSG  
SETPGTSESATPESGGSSGGSSSEVEFSHEYWMRHALTLAKRARDEREVPVGAVLVLNNRVI  
GEGWNRRAIGLHDPATAHAEIMALRQGGGLVMQNYRLIDATLYVTLEPCVMCAGAMIHSRIGRV  
FGVRNAKTGAAGSLMDVLHYPGMNHRVEITEGILADECAALLCYFFRMPRQVFNAQKKAQSS  
TDSGGSSGGSSGSETPGTSESATPESGGSSGGSSDKKYSIGLAIGTNSVGWAVITDEYKVP  
KKFKVLGNTDRHSIKKNLIGALLFDSGETAEATRLKRTARRRYTRRKNRICYLQEIFSNEMA  
KVDDSFHRLEESFLVEEDKKHERHPIFGNIVDEVAYHEKYPTIYHLRKKLVDSTDKADLRL  
IYLALAHMIKFRGHFLIEGDLNPDNSDVKLFIQLVQTYNQLFEENPINASGVDAKAILSAR  
LSKSRLENLIAQLPGEKKNGLFGNLIASLGLTPNFKSNFDLAEDAKLQLSKDITYDDDLN  
LLAQIGDQYADFLAAKNLSDAILLSDILRVNTEITKAPLSASMIKRYDEHHQDLTLLKALV  
RQQLPEKYKEIFFDQSKNGYAGYIDGGASQEEFYKFIKPILEKMDGTEELLVKLNREDLLRK  
QRTFDNGSIPHQIHLGELHAILRRQEDFYFPLKDNREKIEKILTFRIPIYVYVGPLARGNSRFA  
WMTRKSEETITPWNFEEVVDKGASAQSFIERMTNFDKNLPNEKVLPKHSLLEYFTVYNELT  
KVKYVTEGMRKPAFLSGEQKKAIVDLLFKTNRKVTVKQLKEDYFKKIECFDSVEISGVEDRF  
NASLGTYHDLKIKDKDFLDNEENEDILEDIVLTLTLFEDREMIEERLKYAHLFDDKVMK  
QLKRRRYTGWGRLSRKLINGIRDKQSGKTIIDFLKSDGFANRNFQMQLIHDDSLTFKEDIQKA  
QVSGQGDSLHEHIANLAGSPAIKKILQTVKVVDELVKVMGRHKPENIVIVEMARENQTTQKG  
QKNSRERMKRIEEGIKELGSQILKEHPVENTQLQNEKLYLYLQNGRDMYVDQELDINRLSD  
YDVDHIVPQSFLKDDSIDNKVLTRSDKNRGKSDNVPSEEVVKKMKNYWRQLLNAKLITQRKF  
DNLTKAERGGLSELKAGFIKRQLVETRQITKHVAQILDSRMNTKYDENDKLIREVKVITLK  
SKLVSDFRKDFQFYKVREINNYHHAHDAYLNAVGTALIKKYPKLESEFVYGDYKVYDVRKM  
IAKSEQEIGKATAKYFFYSNIMNFFKTEITLANGEIRKRPLIETNGETGEIVWDKGRDFATV  
RKVLSMPQVNIKKTEVQTGGFSKESILPKRNSDKLIARKKDWDPKKYGGFDSPTVAYSVLV  
VAKVEKGSKKLKSVKELLGITIMERSSEFKNPIDFLEAKGYKEVKKDLIIKLPKYSLFELE  
NGRKRMLASAGELQKGNELALPSKYVNFLYLASHYEKLGKSPEDNEQKQLFVEQHKHYLDEI  
IEQISEFSKRVI LADANLDKVL SAYNKHRDKPIREQAENI IHLFTLTNLGAPAAFKYFDTTI  
DRKRYTSTKEVLDATLIHQ SITGLYETRIDLSQLGGDGGGGSGGGSSGGSSGGGGSSGGGS  
GGGSSTNLSDIIEKETGKQLVIQESILMLPEEVEEVI GNKPESDILVHTAYDESTDENVMLL  
TSDAPEYKPWALVIQDSNGENKIKMLSGGSKRPAATKKAGQAKKKKSGGSPKKRKRVRPPPS  
DYKDDDDKDYKDDDDK\*

### AID10-ABE8e-nCas9-UGI

(AID10-XTEN-TadA-32aa linker-TadA8e-32aa linker-nCas9-(GGS)<sub>6</sub> linker-UGI-NLS-NLS-2×FLAG)

MDSLLMNRREFLYQFKNVRWAKGRRETYLCYVVERRDCATSFSLDFGYLRNKNKGCHVELLFL

RYISDWDLDPGRCYRVTWFI SWSPCYDCARHVADFLRGPNLRLRIFAARLYFCEDRKAEP  
 GLRRLRRAGVQIAIMTFKDYFYCWNTFAENHGRTFKAWEGHENSVRLSGQLRRILSGSETP  
 GTSESATPESSEVEFSHEYWMRHALTLAKRAWDEREVPVGAVLVHNNRVI GEGWNRPIGRHD  
 PTAHAEIMALRQGGLVMQNYRLIDATLYVTLEPCVMCAGAMIHSRIGRVVFGARDAKTGAAG  
 SLMDVLHHPGMNHRVEITEGILADECAALLSDFFRMRRQEIKAQKKAQSSTDSGGSSGGSSG  
 SETPGTSESATPESGGSSGGSSSEVEFSHEYWMRHALTLAKRARDEREVPVGAVLVLNNRVI  
 GEGWNRRAIGLHDPTAHAEIMALRQGGLVMQNYRLIDATLYVTLEPCVMCAGAMIHSRIGRVV  
 FGVNRNSKRGAAAGSLMNVLNYPGMNHRVEITEGILADECAALLCDFYRMPRQVFNAQKKAQSS  
 INSGGSSGGSSGSETPGTSESATPESGGSSGGSSDKKYSIGLAIGTNSVGWAVITDEYKVP  
 KKFVVLGNTDRHSIKKNLIGALLFDSGETAEATRLKRTARRRYTRRKNRICYLQEIFSNEMA  
 KVDDSFHRLEESFLVEEDKKHERHPIFGNIVDEVAYHEKYPTIYHLRKKLVDSTDKADLRL  
 IYLALAHMIKFRGHFLIEGDLNPDNSDVKLFIQLVQTYNQLFEENPINASGVDAKAILSAR  
 LSKSRLENLIAQLPGEKKNLFGNLIALSGLTPNFKSNFDLAEDAKLQLSKDITYDDDLN  
 LLAQIGDQYADLFLAAKNLSDAILLSDILRVNTEITKAPLSASMIKRYDEHHQDLTLLKALV  
 RQQLPEKYKEIFFDQSKNGYAGYIDGGASQEEFYKFIKPILEKMDGTEELLVKLNREDLLRK  
 QRTFDNGSIPHQIHLGELHAILRRQEDFYFPLKDNREKIEKILTFRIPIYYVGPLARGNSRFA  
 WMTRKSEETITPWNFEVVVDKGASAQSFIERMTNFDKPNLNEKVLPHKSHLLYEYFTVYNELT  
 KVYVTEGMRKPAFLSGEQKKAIVDLLFKTNRKVTVKQLKEDYFKKIECFDSVEISGVEDRF  
 NASLGTYHDLKIIKDKDFLDNEENEDILEDIVLTLTLFEDREMIEERLKYAHLFDDKVMK  
 QLKRRRYTGWGRLSRKLINGIRDKQSGKTI LDFLKSDFANRNFMLIHDDSLTFKEDIQKA  
 QVSGQGDSLHEHIANLAGSPAIKKGI LQTVKVDELVKVMGRHKPENIVIVEMARENQTTQKG  
 QKNSRERMKRIE EGIKELGSQILKEHPVENTQLQNEKLYLYYLQNGRDMYVDQELDINRLSD  
 YDVDHIVPQSFLKDDSIDNKVLRSDKNRGKSDNVPSEEVVKKMKNYWRQLLNAKLITQRKF  
 DNLTKAERGGLSELKAGFIKRQLVETRQITKHVAQILDSRMNTKYDENDKLIREVKVITLK  
 SKLVSDFRKDFQFYKVREINNYHHAHDAYLNAVVGTA LIKKYPKLESEFVYGDYKVYDVRKM  
 IAKSEQEIGKATAKYFFYSNIMNFFKTEITLANGEIRKRPLIETNGETGEIVWDKGRDFATV  
 RKVLSMPQVNIVKKTVEVQTGGFSKESILPKRNSDKLIARKKDWDPKKYGGFDSPTVAYSVLV  
 VAKVEKGSKKLKSVELLGITIMERSSEKPNIDFLEAKGYKEVKKDLIIKLPKYSLFELE  
 NGRKRMLASAGELQKGNELALPSKYVNFLYLASHYEKLGSPEDNEQQLFVEQHKHYLDEI  
 IEQISEFSKRVI LADANLDKVL SAYNKHDKPIREQAENI IHLFTLTNLGAPAAFKYFDTTI  
 DRKRYTSTKEVL DATLIHQ SITGLYETRIDLSQLGGDGGGGGGGGGGGGGGGGGGGGGGGG  
 GGGGSTNLSDIIEKETGKQLVIQESILMLPEEVEEVI GNKPESDILVHTAYDESTDENVMLL  
 TSDAPEYKPPALVIQDSNGENKIKMLSGGSKRPAATKKAGQAKKKKSGGS PKKKRKV RPPPS  
 DYKDDDDKDYKDDDDK\*

**ABE8e-nCas9**

(*TadA*-32aa linker-*TadA8e*-32aa linker-nCas9-NLS-NLS-2×FLAG)

MGSEVEFSHEYWMRHALTLAKRAWDEREVPVGAVLVHNNRVI GEGWNRPIGRHDPTAHAEIM  
 ALRQGGLVMQNYRLIDATLYVTLEPCVMCAGAMIHSRIGRVVFGARDAKTGAAGSLMDVLH  
 PGMNHRVEITEGILADECAALLSDFFRMRRQEIKAQKKAQSSTDSGGSSGGSSGSETPGTSE  
 SATPESGGSSGGSSSEVEFSHEYWMRHALTLAKRARDEREVPVGAVLVLNNRVI GEGWNRRAI  
 GLHDPTAHAEIMALRQGGLVMQNYRLIDATLYVTLEPCVMCAGAMIHSRIGRVVFGVNRNSK  
 GAAGSLMNVLNYPGMNHRVEITEGILADECAALLCDFYRMPRQVFNAQKKAQSSINSGGSSG

GSSGSETPGTSESATPESSGGSSGGSDKKYSIGLAIGTNSVGWAVITDEYKVPSSKKFKVLGN  
TDRHSIKKNLIGALLFDSGETAEATRLKRTARRRYTRRKNRICYLQEIFSNEMAKVDDSFH  
RLEESFLVEEDKKHERHPIFGNIVDEVAYHEKYPTIYHLRKKLVDSTDKADLRLIYLALAHM  
IKFRGHFLIEGDLNPDNSDVKLFIQLVQTYNQLFEENPINASGVDAKAILSARLSKSRRE  
NLIAQLPGEKKNGLFGNLIASLGLTPNFKSNFDLAEDAQLQSKDQYDDDLNLLAQIGDQ  
YADLFLAAKNLSDAILLSDILRVNTEITKAPLSASMIKRYDEHHQDLTLLKALVRQQLPEKY  
KEIFFDQSKNGYAGYIDGGASQEEFYKFIKPILEKMDGTEELLVKNREDLLRQRTFDNGS  
IPHQIHLGELHAILRRQEDFYFPLKDNREKIEKILTFRIPYYVGPLARGNSRFAMTRKSEE  
TITPWNFEVVDKGASAQSFIERMTNFDKNLPNEKVLPKHSLLEYFTVYNELTKVKYVTEG  
MRKPAFLSGEQKKAIVDLLFKTNRKVTVKQLKEDYFKKIECFDSVEISGVEDRFNASLGTYH  
DLLKIIKDKDFLDNEENEDILEDIVLTLTLFEDREMIEERLKYAHLFDDKVMKQLKRRRYT  
GWGRLSRKLINGIRDKQSGKTILDFLKSDFANRNFQMQLIHDDSLTFKEDIQKAQVSGQGDS  
LHEHIANLAGSPAIKKGIQTVKVVDELVKVMGRHKPENIVIEMARENQTTQKQKNSRERM  
KRIEEGIKELGSQILKEHPVENTQLQNEKLYLYYLQNGRDMYVDQELDINRLSDYDVDHIVP  
QSEFLKDDSIDNKVLTRSDKNRGKSDNVPSEEVVKKMKNYWRQLLNAKLITQRKFDNLTKAER  
GGLSELKAGFIKRQLVETRQITKHVAQILD SRMNTKYDENDKLIREVKVITLKSCLVSDFR  
KDFQFYKVREINNYHHAHDAYLNAVVG TALIKKYPKLESEFVYGDYKVYDVRKMIKSEQEI  
GKATAKYFFYSNIMNFFKTEITLANGEIRKRPLIETNGETGEIVWDKGRDFATVRKVL SMPQ  
VNIVKKTEVQTGGFSKESILPKRNSDKLIARKKDWDPK KYGGFDSPTVAYSVLVVAKVEK GK  
SKKLKSVKELLGITIMERSSEFKNPIDFLEAKGYKEVKKDLI IKLPKYSLFELENGRKRMLA  
SAGELQKGNELALPSKYVNFLYLASHYEKLGSPEDNEQKQLFVEQHKHYLDEIIEQISEFS  
KRVILADANLDKVL SAYNKHRDKPIREQAENI IHLFTLTNLGAPAAFKYFDTTIDRKRYTST  
KEVL DATLIHQSI TGLYETRIDLSQLGGDKRPAATKKAGQAKKKKSGGS PKKKRKV RPPPSD  
YKDDDDKDYKDDDDK\*
